# Supplementary material
Source: PubMed Central journal article supplement (PMC3730818)
Supplement: NIHMS476957-supplement-Supplementary_Data.pdf [file NIHMS476957-supplement-Supplementary_Data.pdf]

# THE LANCET **Oncology**

## **Supplementary appendix**

This appendix formed part of the original submission and has been peer reviewed. We post it as supplied by the authors.

Supplement to: Mossé YP, Lim MS, Voss SD, et al. Safety and activity of crizotinib for paediatric patients with refractory solid tumours or anaplastic large-cell lymphoma: a Children's Oncology Group phase 1 consortium study. *Lancet Oncol* 2013; published online April 16. [http://dx.doi.org/10.1016/S1470-2045\(13\)70095-0](http://dx.doi.org/10.1016/S1470-2045(13)70095-0).

## **Supplementary material**

### **Goals and Objectives**

#### **Primary Aims**

- To estimate the maximum tolerated dose (MTD) and recommend a Phase 2 dose of PF-02341066 administered orally twice daily to children with relapsed/refractory solid tumors and anaplastic large cell lymphoma (ALCL).
- To define and describe the toxicities of PF-02341066 administered on this schedule.
- To characterize the pharmacokinetics of PF-02341066 in children with refractory cancer.

#### **Secondary Aims**

- To preliminarily define the anti-tumor activity of PF-02341066 within the confines of a Phase 1 study.
- To obtain initial Phase 2 data on the anti-tumor activity of PF-02341066 in children with relapsed/refractory neuroblastoma and ALCL.
- To preliminarily examine the relationship between ALK status (e.g, the presence of a mutation, duplication, amplification, and/or translocation) in patients with NB or ALCL and response to PF-02341066.
- To preliminarily examine the relationship between MRD status and clinical response to PF-02341066 in patients with ALCL.

#### ***Patient eligibility***

Age: Patients must be > than 12 months and ≤ 21 years of age at the time of study enrollment.

#### Diagnosis:

- Part A1: Patients with relapsed or refractory solid tumors or ALCL (excluding patients with primary or metastatic CNS tumors or patients with primary cutaneous ALCL).
- Part A2: Patients with confirmed ALK fusion proteins, ALK mutations, ALK amplification (defined as greater than 4-fold increase in the *ALK* signal number as compared to reference signal number on chromosome 2q arm) or MET mutation or amplification. Testing to confirm the presence of ALK fusion proteins, ALK mutations, ALK amplification or evidence of MET mutation or amplification for eligibility purposes must be performed as a CLIA-certified assay. ALK immunohistochemistry can be used as a surrogate for FISH for patients with IMT or ALCL.
- Part A3: Patients with relapsed or refractory neuroblastoma, with or without bone marrow involvement, who are not eligible for Part A1 or A2 or cannot enroll on Part A1 because of stratum suspension or lack of available spots. These patients were enrolled at one dose level below the dose level at which patients on Part A1 were actively enrolling.

#### Organ Function Requirements:

**Patients must have Adequate Bone Marrow Function Defined as:**

#### ***Patients on Part A1 of the study:***

- a. For patients with solid tumors or ALCL without bone marrow involvement:

- Peripheral absolute neutrophil count (ANC)  $\geq 1000/\text{mm}^3$
- Platelet count  $\geq 75,000/\text{mm}^3$  (transfusion independent, defined as not receiving platelet transfusions within a 7 day period prior to enrollment)
- Hemoglobin  $\geq 8.0$  g/dL (may receive RBC transfusions)

b. Patients with known bone marrow metastatic disease:

- Peripheral absolute neutrophil count (ANC)  $\geq 750/\text{mm}^3$
- Platelet count  $\geq 25,000/\text{mm}^3$  (may receive platelet transfusions)
- Hemoglobin  $\geq 8.0$  g/dL (may receive RBC transfusions)
- Not known to be refractory to red cell or platelet transfusions

Transfusions are permitted to meet both the platelet and hemoglobin criteria. Note: Patients with known bone marrow metastatic disease are not evaluable for hematological toxicity for the purposes of dose escalation.

**Patients on Part A2 and Part A3 of the study:**

- Peripheral absolute neutrophil count (ANC)  $\geq 750/\text{mm}^3$
- Platelet count  $\geq 25,000/\text{mm}^3$  (may receive platelet transfusions)
- Hemoglobin  $\geq 8.0$  g/dL (may receive RBC transfusions)
- Not known to be refractory to red cell or platelet transfusions

Transfusions are permitted to meet both the platelet and hemoglobin criteria.

**Adequate Renal Function Defined as:**

- Creatinine clearance or radioisotope GFR  $\geq 70\text{ml}/\text{min}/1.73\text{ m}^2$  or
- A serum creatinine based on age/gender as follows:

| Age              | Maximum Serum Creatinine (mg/dL) |        |
|------------------|----------------------------------|--------|
|                  | Male                             | Female |
| 1 to < 2 years   | 0.6                              | 0.6    |
| 2 to < 6 years   | 0.8                              | 0.8    |
| 6 to < 10 years  | 1                                | 1      |
| 10 to < 13 years | 1.2                              | 1.2    |
| 13 to < 16 years | 1.5                              | 1.4    |
| $\geq 16$ years  | 1.7                              | 1.4    |

The threshold creatinine values in this Table were derived from the Schwartz formula for estimating GFR<sup>18</sup> utilizing child length and stature data published by the CDC.

**Adequate Liver Function Defined as:**

- Bilirubin (sum of conjugated + unconjugated)  $\leq 1.5$  x ULN for age
- SGPT (ALT)  $\leq 110$  U/L. For the purpose of this study, the ULN for SGPT is 45 U/L.
- Serum albumin  $\geq 2$  g/dL.

**Adequate Cardiac Function defined as:**

- QTc  $\leq 480$  msec

### Dose Escalation and Determination of MTD

The rolling six phase 1 trial design will be used for the conduct of Part A1 of this study.\* Two to six patients can be concurrently enrolled onto a dose level, dependent upon (1) the number of patients enrolled at the current dose level, (2) the number of patients who have experienced DLT at the current dose level, and (3) the number of patients entered but with tolerability data pending at the current dose level. Accrual is suspended when a cohort of six has enrolled or when the study endpoints have been met.

Dose level assignment is based on the number of participants currently enrolled in the cohort, the number of DLTs observed, and the number of participants at risk for developing a DLT (i.e., participants enrolled but who are not yet assessable for toxicity). For example, when three participants are enrolled onto a dose cohort, if toxicity data is available for all three when the fourth participant entered and there are no DLTs, the dose is escalated and the fourth participant is enrolled to the subsequent dose level. If data is not yet available for one or more of the first three participants and no DLT has been observed, or if one DLT has been observed, the new participant is entered at the same dose level. Lastly, if two or more DLTs have been observed, the dose level is de-escalated. This process is repeated for participants five and six. In place of suspending accrual after every three participants, accrual is only suspended when a cohort of six is filled. When participants are inevaluable for toxicity, they are replaced with the next available participant if escalation or de-escalation rules have not been fulfilled at the time the next available participant is enrolled onto the study.

The following table provides the decision rules for enrolling a patient at (i) the current dose level (ii) at an escalated dose level, (iii) at a de-escalated dose level, or whether the study is suspended to accrual:

| # Pts Enrolled | # Pts with DLT | # Pts without DLT | # Pts with Data Pending | Decision        |
|----------------|----------------|-------------------|-------------------------|-----------------|
| 2              | 0 or 1         | 0, 1 or 2         | 0, 1 or 2               | Same dose level |
| 2              | 2              | 0                 | 0                       | De-escalate*    |
| 3              | 0              | 0, 1 or 2         | 1, 2 or 3               | Same dose level |
| 3              | 1              | 0, 1 or 2         | 0, 1 or 2               | Same dose level |
| 3              | 0              | 3                 | 0                       | Escalate**      |
| 3              | ≥ 2            | 0 or 1            | 0 or 1                  | De-escalate*    |
| 4              | 0              | 0, 1, 2 or 3      | 1, 2, 3 or 4            | Same dose level |
| 4              | 1              | 0, 1, 2 or 3      | 0, 1, 2 or 3            | Same dose level |
| 4              | 0              | 4                 | 0                       | Escalate**      |
| 4              | ≥ 2            | 0, 1 or 2         | 0, 1 or 2               | De-escalate*    |
| 5              | 0              | 0, 1, 2, 3 or 4   | 1, 2, 3, 4 or 5         | Same dose level |
| 5              | 1              | 0, 1, 2, 3 or 4   | 0, 1, 2, 3 or 4         | Same dose level |
| 5              | 0              | 5                 | 0                       | Escalate**      |
| 5              | ≥ 2            | 0, 1, 2 or 3      | 0, 1, 2 or 3            | De-escalate*    |

| <b># Pts Enrolled</b> | <b># Pts with DLT</b> | <b># Pts without DLT</b> | <b># Pts with Data Pending</b> | <b>Decision</b> |
|-----------------------|-----------------------|--------------------------|--------------------------------|-----------------|
| 6                     | 0                     | 0, 1, 2, 3, or 4         | 2, 3, 4, 5 or 6                | Suspend         |
| 6                     | 1                     | 0, 1, 2, 3 or 4          | 0, 1, 2, 3 or 4                | Suspend         |
| 6                     | 0 or 1                | 5 or 6                   | 0 or 1                         | Escalate**      |
| 6                     | ≥ 2                   | 0, 1, 2, 3 or 4          | 0, 1, 2, 3 or 4                | De-escalate*    |

\* If six patients already entered at next lower dose level, the MTD has been defined.

\*\* If final dose level has been reached, the recommended dose has been reached.

If two or more of a cohort of up to six patients experience DLT at a given dose level, then the MTD has been exceeded and dose escalation will be stopped.

Since this agent is not expected to be associated with dose-limiting myelosuppression, at least 2 of every cohort of 3 or 5 of every cohort of 6 patients must be evaluable for hematologic toxicity. If hematologic dose limiting toxicity is observed, all subsequent patients who are enrolled in Part A1 must be evaluable for hematologic toxicity. Patients in Part A2 or A3 may be enrolled irrespective of whether or not they have bone marrow involvement.

\* Rolling six design reference:

Skolnik JM, Barrett JS, Jayaraman B, et al: Shortening the timeline of pediatric phase I trials: the rolling six design. J Clin Oncol. 26(2):170-1, 2008

**Supplemental Table 1.** Maximum grade of Toxicities by Stratum, Irrespective of Attribution, Observed in Patients during First Cycle of Treatment (Total Cycles =65)

| Toxicity Type                      | Dose Level            | Maximum grade of patient-toxicity |   |   |   |
|------------------------------------|-----------------------|-----------------------------------|---|---|---|
|                                    |                       | 1                                 | 2 | 3 | 4 |
| <b>Stratum A1</b>                  |                       | Total Number of Cycles, 31        |   |   |   |
| Anemia                             | 100 mg/m <sup>2</sup> | 1                                 |   |   |   |
|                                    | 165 mg/m <sup>2</sup> | 2                                 |   |   |   |
|                                    | 215 mg/m <sup>2</sup> | 1                                 | 2 |   |   |
|                                    | 280 mg/m <sup>2</sup> |                                   | 1 |   |   |
|                                    | 365 mg/m <sup>2</sup> | 3                                 | 1 |   |   |
| Lymphocyte count decreased         | 130 mg/m <sup>2</sup> | 1                                 |   |   |   |
|                                    | 165 mg/m <sup>2</sup> | 1                                 | 2 |   |   |
|                                    | 215 mg/m <sup>2</sup> | 1                                 | 1 | 1 |   |
|                                    | 280 mg/m <sup>2</sup> | 2                                 |   |   |   |
|                                    | 365 mg/m <sup>2</sup> | 1                                 |   |   |   |
| Neutrophil count decreased         | 165 mg/m <sup>2</sup> | 1                                 | 2 |   |   |
|                                    | 215 mg/m <sup>2</sup> |                                   | 1 | 2 |   |
|                                    | 280 mg/m <sup>2</sup> |                                   |   | 1 |   |
|                                    | 365 mg/m <sup>2</sup> |                                   | 1 | 3 | 1 |
| White blood cell decreased         | 165 mg/m <sup>2</sup> | 3                                 |   |   |   |
|                                    | 215 mg/m <sup>2</sup> | 1                                 | 1 |   |   |
|                                    | 280 mg/m <sup>2</sup> | 1                                 |   |   |   |
|                                    | 365 mg/m <sup>2</sup> | 2                                 | 1 | 1 |   |
| Abdominal distension               | 130 mg/m <sup>2</sup> | 1                                 |   |   |   |
|                                    | 280 mg/m <sup>2</sup> | 1                                 |   |   |   |
|                                    | 365 mg/m <sup>2</sup> | 1                                 |   |   |   |
| Abdominal pain                     | 100 mg/m <sup>2</sup> | 2                                 |   |   |   |
|                                    | 130 mg/m <sup>2</sup> | 1                                 |   |   |   |
|                                    | 165 mg/m <sup>2</sup> | 2                                 |   |   |   |
|                                    | 215 mg/m <sup>2</sup> |                                   | 1 |   |   |
|                                    | 280 mg/m <sup>2</sup> | 2                                 |   |   |   |
|                                    | 365 mg/m <sup>2</sup> | 1                                 |   |   |   |
| Acidosis                           | 130 mg/m <sup>2</sup> | 1                                 |   |   |   |
|                                    | 165 mg/m <sup>2</sup> | 1                                 |   |   |   |
| Activated PTT prolonged            | 215 mg/m <sup>2</sup> |                                   |   | 1 |   |
| Agitation                          | 280 mg/m <sup>2</sup> | 1                                 |   |   |   |
| Alanine aminotransferase increased | 100 mg/m <sup>2</sup> | 2                                 |   |   |   |
|                                    | 130 mg/m <sup>2</sup> |                                   | 1 |   |   |
|                                    | 165 mg/m <sup>2</sup> | 5                                 | 1 |   |   |
|                                    | 215 mg/m <sup>2</sup> | 3                                 | 1 |   |   |
|                                    | 280 mg/m <sup>2</sup> | 4                                 | 1 |   |   |
|                                    | 365 mg/m <sup>2</sup> | 4                                 | 1 |   | 1 |

|                                      |                       |   |   |   |   |
|--------------------------------------|-----------------------|---|---|---|---|
| Alkaline phosphatase increased       | 165 mg/m <sup>2</sup> |   | 1 |   |   |
|                                      | 215 mg/m <sup>2</sup> | 1 |   |   |   |
|                                      | 365 mg/m <sup>2</sup> | 1 |   | 1 |   |
| Allergic rhinitis                    | 100 mg/m <sup>2</sup> | 1 | 1 |   |   |
| Alopecia                             | 365 mg/m <sup>2</sup> | 1 |   |   |   |
| Anaphylaxis                          | 215 mg/m <sup>2</sup> |   |   | 1 |   |
| Anorexia                             | 215 mg/m <sup>2</sup> | 3 |   |   |   |
|                                      | 280 mg/m <sup>2</sup> | 1 |   |   |   |
|                                      | 365 mg/m <sup>2</sup> | 1 | 2 |   |   |
| Anxiety                              | 165 mg/m <sup>2</sup> |   |   | 1 |   |
| Aspartate aminotransferase increased | 100 mg/m <sup>2</sup> | 2 |   |   |   |
|                                      | 130 mg/m <sup>2</sup> | 1 |   |   |   |
|                                      | 165 mg/m <sup>2</sup> | 5 |   |   |   |
|                                      | 215 mg/m <sup>2</sup> | 5 | 2 |   |   |
|                                      | 280 mg/m <sup>2</sup> | 1 | 1 |   |   |
|                                      | 365 mg/m <sup>2</sup> | 4 |   |   | 1 |
| Ataxia                               | 165 mg/m <sup>2</sup> |   |   | 1 |   |
| Back pain                            | 130 mg/m <sup>2</sup> | 1 |   |   |   |
| Bloating                             | 365 mg/m <sup>2</sup> | 1 |   |   |   |
| Blood bilirubin increased            | 100 mg/m <sup>2</sup> | 1 |   |   |   |
| Blurred vision                       | 130 mg/m <sup>2</sup> |   | 1 |   |   |
|                                      | 165 mg/m <sup>2</sup> | 1 |   |   |   |
|                                      | 215 mg/m <sup>2</sup> | 2 |   |   |   |
|                                      | 280 mg/m <sup>2</sup> | 2 |   |   |   |
| Bronchospasm                         | 100 mg/m <sup>2</sup> |   | 1 |   |   |
| Cheilitis                            | 165 mg/m <sup>2</sup> | 1 |   |   |   |
| Constipation                         | 215 mg/m <sup>2</sup> | 3 |   |   |   |
|                                      | 280 mg/m <sup>2</sup> | 2 |   |   |   |
| Cough                                | 100 mg/m <sup>2</sup> | 2 |   |   |   |
|                                      | 165 mg/m <sup>2</sup> | 1 |   |   |   |
|                                      | 280 mg/m <sup>2</sup> | 1 |   |   |   |
| Creatinine increased                 | 100 mg/m <sup>2</sup> | 1 | 1 |   |   |
|                                      | 165 mg/m <sup>2</sup> | 1 |   |   |   |
|                                      | 215 mg/m <sup>2</sup> | 2 |   |   |   |
|                                      | 280 mg/m <sup>2</sup> | 3 |   |   |   |
|                                      | 365 mg/m <sup>2</sup> | 2 | 1 |   |   |
| Cushingoid                           | 165 mg/m <sup>2</sup> |   | 1 |   |   |
| Dehydration                          | 100 mg/m <sup>2</sup> |   | 1 |   |   |
|                                      | 215 mg/m <sup>2</sup> | 1 |   |   |   |
| Diarrhea                             | 100 mg/m <sup>2</sup> | 1 |   |   |   |
|                                      | 130 mg/m <sup>2</sup> | 1 |   |   |   |

|                                                                               |                       |   |   |   |  |
|-------------------------------------------------------------------------------|-----------------------|---|---|---|--|
|                                                                               | 165 mg/m <sup>2</sup> | 4 |   |   |  |
|                                                                               | 215 mg/m <sup>2</sup> | 1 | 1 |   |  |
|                                                                               | 280 mg/m <sup>2</sup> | 1 |   | 1 |  |
|                                                                               | 365 mg/m <sup>2</sup> | 4 | 1 |   |  |
| Dizziness                                                                     | 165 mg/m <sup>2</sup> | 1 |   |   |  |
|                                                                               | 215 mg/m <sup>2</sup> |   |   | 1 |  |
|                                                                               | 280 mg/m <sup>2</sup> | 1 |   |   |  |
|                                                                               | 365 mg/m <sup>2</sup> | 2 |   |   |  |
| Dry skin                                                                      | 165 mg/m <sup>2</sup> | 1 |   |   |  |
| Dysgeusia                                                                     | 100 mg/m <sup>2</sup> | 1 |   |   |  |
|                                                                               | 215 mg/m <sup>2</sup> | 2 |   |   |  |
|                                                                               | 365 mg/m <sup>2</sup> | 1 |   |   |  |
| Dyspepsia                                                                     | 165 mg/m <sup>2</sup> |   | 1 |   |  |
| Dysphagia                                                                     | 165 mg/m <sup>2</sup> |   | 1 |   |  |
| Dyspnea                                                                       | 165 mg/m <sup>2</sup> |   | 1 |   |  |
| Epistaxis                                                                     | 165 mg/m <sup>2</sup> | 1 |   |   |  |
| Esophagitis                                                                   | 215 mg/m <sup>2</sup> | 1 |   |   |  |
|                                                                               | 365 mg/m <sup>2</sup> |   | 1 |   |  |
| Euphoria                                                                      | 165 mg/m <sup>2</sup> | 1 |   |   |  |
| Eye disorders -<br>Other, specify<br>(farsighted with<br>astigmatism)         | 130 mg/m <sup>2</sup> |   | 1 |   |  |
| Eye disorders -<br>Other, specify<br>(esotropia)                              | 165 mg/m <sup>2</sup> | 1 |   |   |  |
| Eye disorders -<br>Other, specify<br>(palinopsia)                             | 215 mg/m <sup>2</sup> |   | 1 |   |  |
| Eye disorders -<br>Other, specify<br>(images dragging<br>across visual field) | 215 mg/m <sup>2</sup> | 1 |   |   |  |
| Eye disorders -<br>Other, specify<br>(bloodshot eyes)                         | 365 mg/m <sup>2</sup> | 1 |   |   |  |
| Eye disorders -<br>Other, specify<br>(seeing stars)                           | 365 mg/m <sup>2</sup> | 1 |   |   |  |
| Eye pain                                                                      | 280 mg/m <sup>2</sup> | 1 |   |   |  |
| Fatigue                                                                       | 100 mg/m <sup>2</sup> | 1 |   |   |  |
|                                                                               | 165 mg/m <sup>2</sup> | 3 |   |   |  |
|                                                                               | 215 mg/m <sup>2</sup> | 7 |   |   |  |
|                                                                               | 280 mg/m <sup>2</sup> | 1 |   |   |  |
|                                                                               | 365 mg/m <sup>2</sup> | 2 | 1 |   |  |
| Febrile neutropenia                                                           | 100 mg/m <sup>2</sup> |   |   | 1 |  |
| Fever                                                                         | 215 mg/m <sup>2</sup> | 1 |   |   |  |



|                                                                  |                       |   |   |  |   |
|------------------------------------------------------------------|-----------------------|---|---|--|---|
| Flashing lights                                                  | 130 mg/m <sup>2</sup> | 1 |   |  |   |
|                                                                  | 215 mg/m <sup>2</sup> | 1 |   |  |   |
| Flatulence                                                       | 165 mg/m <sup>2</sup> | 2 |   |  |   |
|                                                                  | 215 mg/m <sup>2</sup> | 1 |   |  |   |
| Floaters                                                         | 365 mg/m <sup>2</sup> | 2 |   |  |   |
| Flushing                                                         | 165 mg/m <sup>2</sup> |   | 1 |  |   |
|                                                                  | 280 mg/m <sup>2</sup> | 1 |   |  |   |
| Gait disturbance                                                 | 365 mg/m <sup>2</sup> | 1 |   |  |   |
| Gastrointestinal disorders - Other, specify (Abdominal Cramping) | 215 mg/m <sup>2</sup> | 1 |   |  |   |
| GGT increased                                                    | 100 mg/m <sup>2</sup> | 1 |   |  |   |
|                                                                  | 280 mg/m <sup>2</sup> | 1 |   |  |   |
|                                                                  | 365 mg/m <sup>2</sup> | 1 |   |  | 1 |
| Headache                                                         | 165 mg/m <sup>2</sup> | 1 |   |  |   |
|                                                                  | 215 mg/m <sup>2</sup> | 1 | 1 |  |   |
|                                                                  | 365 mg/m <sup>2</sup> | 2 |   |  |   |
| Hematuria                                                        | 280 mg/m <sup>2</sup> | 1 |   |  |   |
| Hypercalcemia                                                    | 280 mg/m <sup>2</sup> | 1 |   |  |   |
| Hyperglycemia                                                    | 100 mg/m <sup>2</sup> | 1 |   |  |   |
|                                                                  | 165 mg/m <sup>2</sup> |   | 1 |  |   |
|                                                                  | 215 mg/m <sup>2</sup> | 1 |   |  |   |
|                                                                  | 365 mg/m <sup>2</sup> | 2 |   |  |   |
| Hyperkalemia                                                     | 130 mg/m <sup>2</sup> | 1 |   |  |   |
|                                                                  | 165 mg/m <sup>2</sup> | 1 |   |  |   |
| Hypermagnesemia                                                  | 130 mg/m <sup>2</sup> | 2 |   |  |   |
|                                                                  | 215 mg/m <sup>2</sup> | 2 |   |  |   |
|                                                                  | 365 mg/m <sup>2</sup> | 2 |   |  |   |
| Hypernatremia                                                    | 365 mg/m <sup>2</sup> | 1 |   |  |   |
| Hypertension                                                     | 165 mg/m <sup>2</sup> | 1 |   |  |   |
| Hyperuricemia                                                    | 365 mg/m <sup>2</sup> | 1 |   |  |   |
| Hypoalbuminemia                                                  | 100 mg/m <sup>2</sup> | 2 |   |  |   |
|                                                                  | 165 mg/m <sup>2</sup> | 2 |   |  |   |
|                                                                  | 215 mg/m <sup>2</sup> | 1 |   |  |   |
|                                                                  | 280 mg/m <sup>2</sup> | 1 |   |  |   |
|                                                                  | 365 mg/m <sup>2</sup> | 3 |   |  |   |
| Hypocalcemia                                                     | 130 mg/m <sup>2</sup> | 1 |   |  |   |
|                                                                  | 165 mg/m <sup>2</sup> | 2 |   |  |   |
|                                                                  | 215 mg/m <sup>2</sup> |   | 1 |  |   |
|                                                                  | 280 mg/m <sup>2</sup> | 1 |   |  |   |
|                                                                  | 365 mg/m <sup>2</sup> | 2 |   |  |   |

|                                                                                                                                           |                       |   |   |   |  |
|-------------------------------------------------------------------------------------------------------------------------------------------|-----------------------|---|---|---|--|
| Hypoglycemia                                                                                                                              | 100 mg/m <sup>2</sup> | 1 |   |   |  |
|                                                                                                                                           | 365 mg/m <sup>2</sup> | 2 | 1 |   |  |
| Hypokalemia                                                                                                                               | 100 mg/m <sup>2</sup> | 1 |   |   |  |
|                                                                                                                                           | 130 mg/m <sup>2</sup> | 1 |   |   |  |
| Hypomagnesemia                                                                                                                            | 165 mg/m <sup>2</sup> | 1 |   |   |  |
|                                                                                                                                           | 365 mg/m <sup>2</sup> | 1 |   |   |  |
| Hyponatremia                                                                                                                              | 100 mg/m <sup>2</sup> | 1 |   |   |  |
|                                                                                                                                           | 165 mg/m <sup>2</sup> | 1 |   |   |  |
|                                                                                                                                           | 280 mg/m <sup>2</sup> | 1 |   |   |  |
| Hypophosphatemia                                                                                                                          | 100 mg/m <sup>2</sup> | 1 |   |   |  |
|                                                                                                                                           | 165 mg/m <sup>2</sup> | 1 |   |   |  |
|                                                                                                                                           | 215 mg/m <sup>2</sup> | 4 |   |   |  |
|                                                                                                                                           | 365 mg/m <sup>2</sup> | 3 |   |   |  |
| Hypotension                                                                                                                               | 100 mg/m <sup>2</sup> | 1 |   |   |  |
|                                                                                                                                           | 215 mg/m <sup>2</sup> | 2 |   |   |  |
|                                                                                                                                           | 280 mg/m <sup>2</sup> | 1 |   |   |  |
| Hypoxia                                                                                                                                   | 165 mg/m <sup>2</sup> |   | 1 |   |  |
| Infections and infestations - Other, specify (Influenza A)                                                                                | 100 mg/m <sup>2</sup> |   | 1 |   |  |
| Infections and infestations - Other, specify (Infection with Grade 3 or 4 neutrophils (ANC <1.0 x 10 <sup>9</sup> /L): Urinary tract NOS) | 280 mg/m <sup>2</sup> |   | 1 |   |  |
| Intracranial hemorrhage                                                                                                                   | 215 mg/m <sup>2</sup> | 1 |   |   |  |
| Investigations - Other, specify (increased BUN)                                                                                           | 130 mg/m <sup>2</sup> | 1 |   |   |  |
| Irritability                                                                                                                              | 365 mg/m <sup>2</sup> | 1 |   |   |  |
| Lipase increased                                                                                                                          | 215 mg/m <sup>2</sup> |   |   | 1 |  |
| Myositis                                                                                                                                  | 365 mg/m <sup>2</sup> |   |   | 1 |  |
| Nausea                                                                                                                                    | 100 mg/m <sup>2</sup> | 2 |   |   |  |
|                                                                                                                                           | 130 mg/m <sup>2</sup> | 3 |   |   |  |
|                                                                                                                                           | 165 mg/m <sup>2</sup> | 4 |   |   |  |
|                                                                                                                                           | 215 mg/m <sup>2</sup> | 3 | 1 |   |  |
|                                                                                                                                           | 280 mg/m <sup>2</sup> | 1 | 1 |   |  |
|                                                                                                                                           | 365 mg/m <sup>2</sup> | 3 | 2 |   |  |
| Nervous system disorders - Other, specify (Nystagmus)                                                                                     | 130 mg/m <sup>2</sup> | 1 |   |   |  |
| Nervous system disorders - Other, specify (presyncope)                                                                                    | 280 mg/m <sup>2</sup> |   | 1 |   |  |

|                                                                                                                |                       |   |   |   |  |
|----------------------------------------------------------------------------------------------------------------|-----------------------|---|---|---|--|
| Non-cardiac chest pain                                                                                         | 165 mg/m <sup>2</sup> |   | 1 |   |  |
|                                                                                                                | 365 mg/m <sup>2</sup> | 1 |   |   |  |
| Oral pain                                                                                                      | 365 mg/m <sup>2</sup> | 1 |   |   |  |
| Otitis media                                                                                                   | 365 mg/m <sup>2</sup> |   | 1 |   |  |
| Pain                                                                                                           | 100 mg/m <sup>2</sup> | 1 |   |   |  |
|                                                                                                                | 280 mg/m <sup>2</sup> | 1 |   |   |  |
|                                                                                                                | 365 mg/m <sup>2</sup> |   |   | 1 |  |
| Pain in extremity                                                                                              | 215 mg/m <sup>2</sup> | 1 |   |   |  |
|                                                                                                                | 280 mg/m <sup>2</sup> | 1 |   |   |  |
|                                                                                                                | 365 mg/m <sup>2</sup> | 2 |   |   |  |
| Palpitations                                                                                                   | 165 mg/m <sup>2</sup> |   | 1 |   |  |
| Peripheral motor neuropathy                                                                                    | 100 mg/m <sup>2</sup> | 1 |   |   |  |
|                                                                                                                | 165 mg/m <sup>2</sup> |   | 1 |   |  |
| Peripheral sensory neuropathy                                                                                  | 215 mg/m <sup>2</sup> |   | 1 |   |  |
| Pharyngolaryngeal pain                                                                                         | 280 mg/m <sup>2</sup> | 1 |   |   |  |
| Photophobia                                                                                                    | 165 mg/m <sup>2</sup> | 1 |   |   |  |
| Proteinuria                                                                                                    | 280 mg/m <sup>2</sup> |   | 1 |   |  |
| Pyramidal tract syndrome                                                                                       | 165 mg/m <sup>2</sup> | 1 |   |   |  |
| Respiratory, thoracic and mediastinal disorders - Other, specify (crackles)                                    | 100 mg/m <sup>2</sup> | 1 |   |   |  |
| Respiratory, thoracic and mediastinal disorders - Other, specify (Upper Respiratory Infection Symptoms)        | 130 mg/m <sup>2</sup> | 1 |   |   |  |
| Serum amylase increased                                                                                        | 215 mg/m <sup>2</sup> | 1 |   |   |  |
| Sinus disorder                                                                                                 | 215 mg/m <sup>2</sup> | 1 |   |   |  |
| Sinus tachycardia                                                                                              | 100 mg/m <sup>2</sup> | 1 |   |   |  |
|                                                                                                                | 165 mg/m <sup>2</sup> | 1 |   |   |  |
| Skin and subcutaneous tissue disorders - Other, specify (hair growth noted on face, fine and dark)             | 130 mg/m <sup>2</sup> | 1 |   |   |  |
| Skin and subcutaneous tissue disorders - Other, specify (Abrasions noted on right forearm and right lower leg) | 280 mg/m <sup>2</sup> | 1 |   |   |  |

|                                                 |                       |                                   |   |   |   |
|-------------------------------------------------|-----------------------|-----------------------------------|---|---|---|
| Skin infection                                  | 280 mg/m <sup>2</sup> |                                   | 1 |   |   |
| Sore throat                                     | 365 mg/m <sup>2</sup> | 1                                 |   |   |   |
| Stomach pain                                    | 365 mg/m <sup>2</sup> | 2                                 |   |   |   |
| Tinnitus                                        | 215 mg/m <sup>2</sup> |                                   | 1 |   |   |
| Urinary frequency                               | 165 mg/m <sup>2</sup> | 1                                 |   |   |   |
| Urinary incontinence                            | 165 mg/m <sup>2</sup> | 1                                 |   |   |   |
| Vomiting                                        | 100 mg/m <sup>2</sup> | 1                                 |   |   |   |
|                                                 | 130 mg/m <sup>2</sup> | 1                                 |   |   |   |
|                                                 | 165 mg/m <sup>2</sup> | 2                                 | 1 |   |   |
|                                                 | 215 mg/m <sup>2</sup> | 2                                 |   | 1 |   |
|                                                 | 280 mg/m <sup>2</sup> |                                   | 1 |   |   |
|                                                 | 365 mg/m <sup>2</sup> | 5                                 |   |   |   |
| Weight gain                                     | 165 mg/m <sup>2</sup> |                                   | 1 |   |   |
| Weight loss                                     | 100 mg/m <sup>2</sup> | 1                                 |   |   |   |
|                                                 | 365 mg/m <sup>2</sup> | 1                                 |   |   |   |
| <b>Stratum A2</b>                               |                       | <b>Total Number of Cycles, 24</b> |   |   |   |
| Anemia                                          | 100 mg/m <sup>2</sup> |                                   | 1 |   |   |
|                                                 | 165 mg/m <sup>2</sup> | 1                                 | 1 |   |   |
|                                                 | 280 mg/m <sup>2</sup> | 2                                 | 1 |   |   |
| Lymphocyte count decreased                      | 100 mg/m <sup>2</sup> |                                   |   |   | 1 |
|                                                 | 165 mg/m <sup>2</sup> |                                   |   | 1 |   |
| Neutrophil count decreased                      | 100 mg/m <sup>2</sup> |                                   | 1 |   |   |
|                                                 | 165 mg/m <sup>2</sup> |                                   | 2 | 1 | 1 |
|                                                 | 280 mg/m <sup>2</sup> | 1                                 | 1 | 1 |   |
| Platelet count decreased                        | 165 mg/m <sup>2</sup> | 1                                 |   |   |   |
|                                                 | 280 mg/m <sup>2</sup> | 1                                 |   |   |   |
| White blood cell decreased                      | 100 mg/m <sup>2</sup> |                                   | 1 |   |   |
|                                                 | 165 mg/m <sup>2</sup> | 1                                 |   |   |   |
|                                                 | 280 mg/m <sup>2</sup> | 2                                 |   |   |   |
| Abdominal distension                            | 165 mg/m <sup>2</sup> |                                   |   | 1 |   |
| Abdominal pain                                  | 165 mg/m <sup>2</sup> | 3                                 |   |   |   |
|                                                 | 280 mg/m <sup>2</sup> | 2                                 |   |   |   |
| Activated partial thromboplastin time prolonged | 165 mg/m <sup>2</sup> | 1                                 |   |   |   |
| Agitation                                       | 165 mg/m <sup>2</sup> |                                   | 1 |   |   |
| Alanine aminotransferase increased              | 100 mg/m <sup>2</sup> | 1                                 | 1 |   |   |
|                                                 | 165 mg/m <sup>2</sup> | 2                                 | 2 |   |   |
|                                                 | 280 mg/m <sup>2</sup> | 4                                 | 1 |   |   |
| Allergic reaction                               | 280 mg/m <sup>2</sup> | 1                                 |   |   |   |
| Allergic rhinitis                               | 100 mg/m <sup>2</sup> | 1                                 |   |   |   |
|                                                 | 280 mg/m <sup>2</sup> | 1                                 |   |   |   |

|                                                   |                       |   |   |   |  |
|---------------------------------------------------|-----------------------|---|---|---|--|
| Alopecia                                          | 100 mg/m <sup>2</sup> | 1 | 1 |   |  |
|                                                   | 165 mg/m <sup>2</sup> | 1 |   |   |  |
| Anorexia                                          | 165 mg/m <sup>2</sup> | 1 | 1 |   |  |
|                                                   | 280 mg/m <sup>2</sup> | 3 |   |   |  |
| Aspartate aminotransferase increased              | 100 mg/m <sup>2</sup> |   | 1 |   |  |
|                                                   | 165 mg/m <sup>2</sup> | 4 |   |   |  |
|                                                   | 215 mg/m <sup>2</sup> | 1 |   |   |  |
|                                                   | 280 mg/m <sup>2</sup> | 5 | 1 | 1 |  |
| Back pain                                         | 165 mg/m <sup>2</sup> |   | 1 |   |  |
| Blurred vision                                    | 165 mg/m <sup>2</sup> | 2 |   |   |  |
|                                                   | 280 mg/m <sup>2</sup> | 3 |   |   |  |
| Bone pain                                         | 280 mg/m <sup>2</sup> | 1 |   |   |  |
| Burn                                              | 165 mg/m <sup>2</sup> | 1 |   |   |  |
| Chronic kidney disease                            | 165 mg/m <sup>2</sup> | 1 |   |   |  |
| Conjunctivitis                                    | 165 mg/m <sup>2</sup> |   | 1 |   |  |
| Constipation                                      | 165 mg/m <sup>2</sup> | 4 |   |   |  |
|                                                   | 280 mg/m <sup>2</sup> | 1 |   |   |  |
| Cough                                             | 100 mg/m <sup>2</sup> | 1 |   |   |  |
|                                                   | 165 mg/m <sup>2</sup> | 3 |   |   |  |
|                                                   | 280 mg/m <sup>2</sup> | 5 |   |   |  |
| CPK increased                                     | 165 mg/m <sup>2</sup> | 1 |   |   |  |
| Creatinine increased                              | 165 mg/m <sup>2</sup> | 4 |   | 1 |  |
|                                                   | 280 mg/m <sup>2</sup> | 1 |   |   |  |
| Dehydration                                       | 165 mg/m <sup>2</sup> |   | 2 |   |  |
| Depressed level of consciousness                  | 165 mg/m <sup>2</sup> |   | 1 |   |  |
| Depression                                        | 165 mg/m <sup>2</sup> | 1 | 1 |   |  |
| Diarrhea                                          | 100 mg/m <sup>2</sup> | 1 |   |   |  |
|                                                   | 165 mg/m <sup>2</sup> | 4 | 2 |   |  |
|                                                   | 280 mg/m <sup>2</sup> | 2 |   |   |  |
| Dizziness                                         | 165 mg/m <sup>2</sup> | 1 |   |   |  |
|                                                   | 280 mg/m <sup>2</sup> | 1 |   |   |  |
| Dry skin                                          | 280 mg/m <sup>2</sup> | 1 |   |   |  |
| Dyspepsia                                         | 165 mg/m <sup>2</sup> | 2 |   |   |  |
| Edema face                                        | 165 mg/m <sup>2</sup> | 1 |   |   |  |
|                                                   | 280 mg/m <sup>2</sup> | 1 |   |   |  |
| Edema limbs                                       | 165 mg/m <sup>2</sup> | 1 |   |   |  |
|                                                   | 280 mg/m <sup>2</sup> | 1 |   |   |  |
| Edema trunk                                       | 165 mg/m <sup>2</sup> | 1 |   |   |  |
| Electrocardiogram QT corrected interval prolonged | 165 mg/m <sup>2</sup> | 1 |   |   |  |

|                                                                                         |                       |   |   |   |  |
|-----------------------------------------------------------------------------------------|-----------------------|---|---|---|--|
| Epistaxis                                                                               | 280 mg/m <sup>2</sup> | 1 |   |   |  |
| Erectile dysfunction                                                                    | 165 mg/m <sup>2</sup> |   | 1 |   |  |
| Eye disorders - Other, specify (halos around objects)                                   | 165 mg/m <sup>2</sup> | 1 |   |   |  |
| Eye disorders - Other, specify (Seeing shadows in eye field)                            | 165 mg/m <sup>2</sup> | 1 |   |   |  |
| Eye disorders - Other, specify (Shadows in peripheral vision, particularly upon waking) | 280 mg/m <sup>2</sup> | 1 |   |   |  |
| Eye pain                                                                                | 280 mg/m <sup>2</sup> | 1 |   |   |  |
| Fatigue                                                                                 | 165 mg/m <sup>2</sup> | 1 | 1 |   |  |
|                                                                                         | 215 mg/m <sup>2</sup> | 1 |   |   |  |
|                                                                                         | 280 mg/m <sup>2</sup> | 3 |   |   |  |
| Fever                                                                                   | 165 mg/m <sup>2</sup> | 3 | 1 |   |  |
|                                                                                         | 280 mg/m <sup>2</sup> |   |   | 1 |  |
| Fracture                                                                                | 280 mg/m <sup>2</sup> |   | 1 |   |  |
| Gastrointestinal disorders - Other, specify (gastroenteritis)                           | 280 mg/m <sup>2</sup> | 1 |   |   |  |
| GGT increased                                                                           | 165 mg/m <sup>2</sup> | 1 | 1 | 1 |  |
|                                                                                         | 280 mg/m <sup>2</sup> |   | 1 |   |  |
| Headache                                                                                | 165 mg/m <sup>2</sup> | 1 | 1 |   |  |
|                                                                                         | 280 mg/m <sup>2</sup> | 2 |   |   |  |
| Hemoglobinuria                                                                          | 165 mg/m <sup>2</sup> | 1 |   |   |  |
| Hyperglycemia                                                                           | 100 mg/m <sup>2</sup> |   | 1 |   |  |
|                                                                                         | 165 mg/m <sup>2</sup> | 4 |   |   |  |
|                                                                                         | 280 mg/m <sup>2</sup> | 1 |   |   |  |
| Hypermagnesemia                                                                         | 280 mg/m <sup>2</sup> | 3 |   |   |  |
| Hypertension                                                                            | 165 mg/m <sup>2</sup> | 2 |   |   |  |
| Hyperuricemia                                                                           | 165 mg/m <sup>2</sup> | 1 |   |   |  |
| Hypoalbuminemia                                                                         | 100 mg/m <sup>2</sup> | 1 | 1 |   |  |
|                                                                                         | 165 mg/m <sup>2</sup> | 1 | 2 |   |  |
|                                                                                         | 280 mg/m <sup>2</sup> | 1 | 1 |   |  |
| Hypocalcemia                                                                            | 165 mg/m <sup>2</sup> | 2 | 3 |   |  |
|                                                                                         | 280 mg/m <sup>2</sup> | 1 |   |   |  |
| Hypoglycemia                                                                            | 280 mg/m <sup>2</sup> | 1 |   |   |  |
| Hypokalemia                                                                             | 100 mg/m <sup>2</sup> | 1 |   |   |  |
|                                                                                         | 165 mg/m <sup>2</sup> |   |   | 2 |  |
|                                                                                         | 280 mg/m <sup>2</sup> | 1 | 1 |   |  |

|                                                                                                                              |                       |   |   |   |  |
|------------------------------------------------------------------------------------------------------------------------------|-----------------------|---|---|---|--|
| Hypomagnesemia                                                                                                               | 165 mg/m <sup>2</sup> | 2 |   |   |  |
| Hyponatremia                                                                                                                 | 100 mg/m <sup>2</sup> | 1 |   |   |  |
|                                                                                                                              | 165 mg/m <sup>2</sup> | 1 |   |   |  |
|                                                                                                                              | 280 mg/m <sup>2</sup> | 2 |   |   |  |
| Hypophosphatemia                                                                                                             | 165 mg/m <sup>2</sup> | 2 |   |   |  |
|                                                                                                                              | 215 mg/m <sup>2</sup> | 1 |   |   |  |
|                                                                                                                              | 280 mg/m <sup>2</sup> | 1 |   |   |  |
| Hypotension                                                                                                                  | 165 mg/m <sup>2</sup> | 1 | 1 |   |  |
| Hypoxia                                                                                                                      | 165 mg/m <sup>2</sup> |   |   | 1 |  |
| Infections and infestations - Other, specify (Infection with Grade 3 or 4 neutrophils (ANC <1.0 x 10e9/L): Catheter-related) | 165 mg/m <sup>2</sup> |   |   | 1 |  |
| Infections and infestations - Other, specify (Viral gastroenteritis)                                                         | 280 mg/m <sup>2</sup> |   | 1 |   |  |
| Investigations - Other, specify (increased C-reactive protein)                                                               | 280 mg/m <sup>2</sup> | 1 |   |   |  |
| Investigations - Other, specify (increased neutrophil count)                                                                 | 280 mg/m <sup>2</sup> | 1 |   |   |  |
| Lip infection                                                                                                                | 280 mg/m <sup>2</sup> | 1 |   |   |  |
| Localized edema                                                                                                              | 280 mg/m <sup>2</sup> | 1 |   |   |  |
| Metabolism and nutrition disorders - Other, specify (decreased AN-GAP)                                                       | 280 mg/m <sup>2</sup> | 1 |   |   |  |
| Metabolism and nutrition disorders - Other, specify (increased chloride)                                                     | 280 mg/m <sup>2</sup> | 1 |   |   |  |
| Metabolism and nutrition disorders - Other, specify (hyperphosphatemia)                                                      | 280 mg/m <sup>2</sup> | 1 |   |   |  |
| Mucositis oral                                                                                                               | 165 mg/m <sup>2</sup> | 1 |   |   |  |
| Muscle weakness lower limb                                                                                                   | 280 mg/m <sup>2</sup> | 1 |   |   |  |
| Nausea                                                                                                                       | 100 mg/m <sup>2</sup> | 1 |   |   |  |
|                                                                                                                              | 165 mg/m <sup>2</sup> | 5 | 2 |   |  |
|                                                                                                                              | 215 mg/m <sup>2</sup> | 1 |   |   |  |
|                                                                                                                              | 280 mg/m <sup>2</sup> | 7 |   |   |  |
| Neuralgia                                                                                                                    | 165 mg/m <sup>2</sup> |   |   | 1 |  |

|                                                                                                             |                       |   |   |   |  |
|-------------------------------------------------------------------------------------------------------------|-----------------------|---|---|---|--|
| Non-cardiac chest pain                                                                                      | 165 mg/m <sup>2</sup> | 1 |   | 1 |  |
|                                                                                                             | 280 mg/m <sup>2</sup> | 1 |   |   |  |
| Oral hemorrhage                                                                                             | 280 mg/m <sup>2</sup> | 1 |   |   |  |
| Oral pain                                                                                                   | 280 mg/m <sup>2</sup> | 1 |   |   |  |
| Pain                                                                                                        | 165 mg/m <sup>2</sup> |   | 1 |   |  |
|                                                                                                             | 280 mg/m <sup>2</sup> | 2 |   |   |  |
| Pain in extremity                                                                                           | 165 mg/m <sup>2</sup> | 1 |   |   |  |
|                                                                                                             | 280 mg/m <sup>2</sup> | 1 |   |   |  |
| Papilledema                                                                                                 | 280 mg/m <sup>2</sup> | 1 |   |   |  |
| Pelvic pain                                                                                                 | 165 mg/m <sup>2</sup> |   | 1 |   |  |
| Pericardial effusion                                                                                        | 165 mg/m <sup>2</sup> |   | 1 |   |  |
| Peripheral sensory neuropathy                                                                               | 165 mg/m <sup>2</sup> | 1 |   |   |  |
| Pharyngolaryngeal pain                                                                                      | 165 mg/m <sup>2</sup> | 3 |   |   |  |
| Pleural effusion                                                                                            | 165 mg/m <sup>2</sup> | 1 |   |   |  |
| Pruritus                                                                                                    | 280 mg/m <sup>2</sup> | 1 |   |   |  |
| Rash acneiform                                                                                              | 165 mg/m <sup>2</sup> | 1 |   |   |  |
| Rash maculo-papular                                                                                         | 165 mg/m <sup>2</sup> | 3 |   |   |  |
|                                                                                                             | 280 mg/m <sup>2</sup> | 1 |   |   |  |
| Respiratory, thoracic and mediastinal disorders - Other, specify (tachypnea (breaths fast when she sleeps)) | 280 mg/m <sup>2</sup> | 1 |   |   |  |
| Rhinitis infective                                                                                          | 280 mg/m <sup>2</sup> | 1 |   |   |  |
| Sinus bradycardia                                                                                           | 165 mg/m <sup>2</sup> | 1 |   |   |  |
| Skin and subcutaneous tissue disorders - Other, specify                                                     | 165 mg/m <sup>2</sup> | 1 |   |   |  |
|                                                                                                             | 280 mg/m <sup>2</sup> | 1 |   |   |  |
| Skin ulceration                                                                                             | 165 mg/m <sup>2</sup> |   | 1 |   |  |
| Sneezing                                                                                                    | 280 mg/m <sup>2</sup> | 1 |   |   |  |
| Sore throat                                                                                                 | 280 mg/m <sup>2</sup> | 1 |   |   |  |
| Stomach pain                                                                                                | 165 mg/m <sup>2</sup> | 1 |   |   |  |
|                                                                                                             | 280 mg/m <sup>2</sup> | 1 |   |   |  |
| Toothache                                                                                                   | 280 mg/m <sup>2</sup> | 1 |   |   |  |
| Tremor                                                                                                      | 165 mg/m <sup>2</sup> | 1 |   |   |  |
| Upper respiratory infection                                                                                 | 165 mg/m <sup>2</sup> |   | 1 |   |  |
|                                                                                                             | 280 mg/m <sup>2</sup> |   | 1 |   |  |
| Urinary tract pain                                                                                          | 280 mg/m <sup>2</sup> | 1 |   |   |  |
| Vascular access complication                                                                                | 280 mg/m <sup>2</sup> |   | 1 |   |  |
| Vomiting                                                                                                    | 100 mg/m <sup>2</sup> | 1 |   |   |  |



|                                      |                       |                                   |   |   |  |
|--------------------------------------|-----------------------|-----------------------------------|---|---|--|
|                                      | 165 mg/m <sup>2</sup> | 7                                 | 2 | 1 |  |
|                                      | 215 mg/m <sup>2</sup> | 1                                 |   |   |  |
|                                      | 280 mg/m <sup>2</sup> | 6                                 | 2 |   |  |
| Weight gain                          | 165 mg/m <sup>2</sup> | 1                                 |   |   |  |
| Weight loss                          | 165 mg/m <sup>2</sup> | 1                                 |   |   |  |
|                                      | 280 mg/m <sup>2</sup> | 1                                 |   |   |  |
| <b>Stratum A3</b>                    |                       | <b>Total Number of Cycles, 10</b> |   |   |  |
| Anemia                               | 215 mg/m <sup>2</sup> | 1                                 |   |   |  |
| Neutrophil count decreased           | 215 mg/m <sup>2</sup> |                                   | 1 |   |  |
| White blood cell decreased           | 215 mg/m <sup>2</sup> | 1                                 |   |   |  |
| Abdominal distension                 | 280 mg/m <sup>2</sup> | 1                                 |   |   |  |
| Agitation                            | 165 mg/m <sup>2</sup> | 1                                 |   |   |  |
| Alanine aminotransferase increased   | 165 mg/m <sup>2</sup> | 1                                 | 1 |   |  |
|                                      | 215 mg/m <sup>2</sup> | 3                                 |   |   |  |
|                                      | 280 mg/m <sup>2</sup> | 1                                 |   | 1 |  |
| Alkaline phosphatase increased       | 215 mg/m <sup>2</sup> | 1                                 |   |   |  |
| Anorexia                             | 215 mg/m <sup>2</sup> | 1                                 |   |   |  |
|                                      | 280 mg/m <sup>2</sup> | 2                                 |   |   |  |
| Aspartate aminotransferase increased | 165 mg/m <sup>2</sup> |                                   | 1 |   |  |
|                                      | 215 mg/m <sup>2</sup> | 3                                 |   |   |  |
|                                      | 280 mg/m <sup>2</sup> | 1                                 |   | 1 |  |
| Back pain                            | 280 mg/m <sup>2</sup> | 1                                 |   |   |  |
| Blurred vision                       | 130 mg/m <sup>2</sup> | 1                                 |   |   |  |
|                                      | 165 mg/m <sup>2</sup> | 1                                 |   |   |  |
|                                      | 280 mg/m <sup>2</sup> | 2                                 |   |   |  |
| Bone pain                            | 165 mg/m <sup>2</sup> |                                   |   | 1 |  |
| Confusion                            | 165 mg/m <sup>2</sup> | 1                                 |   |   |  |
|                                      | 280 mg/m <sup>2</sup> | 1                                 |   |   |  |
| Constipation                         | 280 mg/m <sup>2</sup> | 1                                 |   |   |  |
| Cough                                | 280 mg/m <sup>2</sup> | 1                                 |   |   |  |
| Creatinine increased                 | 165 mg/m <sup>2</sup> | 2                                 |   |   |  |
|                                      | 280 mg/m <sup>2</sup> | 1                                 |   |   |  |
| Diarrhea                             | 165 mg/m <sup>2</sup> | 1                                 |   |   |  |
|                                      | 215 mg/m <sup>2</sup> | 2                                 |   |   |  |
|                                      | 280 mg/m <sup>2</sup> | 2                                 |   |   |  |
| Dry skin                             | 215 mg/m <sup>2</sup> | 1                                 |   |   |  |
| Dysesthesia                          | 280 mg/m <sup>2</sup> | 1                                 |   |   |  |
| Dyspepsia                            | 215 mg/m <sup>2</sup> |                                   | 1 |   |  |
| Edema limbs                          | 280 mg/m <sup>2</sup> | 1                                 |   |   |  |

|                                                         |                       |   |   |   |  |
|---------------------------------------------------------|-----------------------|---|---|---|--|
| Extraocular muscle paresis                              | 215 mg/m <sup>2</sup> |   | 1 |   |  |
| Eye disorders - Other, specify (Jumping vision.)        | 280 mg/m <sup>2</sup> | 1 |   |   |  |
| Eye disorders - Other, specify (seeing trails)          | 280 mg/m <sup>2</sup> | 1 |   |   |  |
| Fatigue                                                 | 280 mg/m <sup>2</sup> | 3 |   |   |  |
| Fever                                                   | 280 mg/m <sup>2</sup> | 1 |   |   |  |
| Flashing lights                                         | 165 mg/m <sup>2</sup> | 1 |   |   |  |
| GGT increased                                           | 280 mg/m <sup>2</sup> |   | 1 |   |  |
| Hallucinations                                          | 280 mg/m <sup>2</sup> | 1 |   |   |  |
| Hyperglycemia                                           | 165 mg/m <sup>2</sup> | 1 |   |   |  |
|                                                         | 280 mg/m <sup>2</sup> | 1 |   |   |  |
| Hyperkalemia                                            | 165 mg/m <sup>2</sup> |   | 1 |   |  |
| Hypermagnesemia                                         | 215 mg/m <sup>2</sup> | 1 |   |   |  |
|                                                         | 280 mg/m <sup>2</sup> | 1 |   |   |  |
| Hypoalbuminemia                                         | 165 mg/m <sup>2</sup> |   | 1 |   |  |
|                                                         | 215 mg/m <sup>2</sup> | 1 |   |   |  |
|                                                         | 280 mg/m <sup>2</sup> |   | 1 |   |  |
| Hypocalcemia                                            | 165 mg/m <sup>2</sup> | 2 |   |   |  |
|                                                         | 215 mg/m <sup>2</sup> | 1 |   |   |  |
|                                                         | 280 mg/m <sup>2</sup> |   | 1 |   |  |
| Hypoglycemia                                            | 280 mg/m <sup>2</sup> | 1 |   |   |  |
| Hypokalemia                                             | 130 mg/m <sup>2</sup> | 1 |   |   |  |
|                                                         | 165 mg/m <sup>2</sup> | 1 |   |   |  |
|                                                         | 215 mg/m <sup>2</sup> | 1 |   |   |  |
| Hyponatremia                                            | 165 mg/m <sup>2</sup> | 1 |   |   |  |
|                                                         | 280 mg/m <sup>2</sup> | 2 |   |   |  |
| Hypophosphatemia                                        | 165 mg/m <sup>2</sup> | 1 |   |   |  |
|                                                         | 280 mg/m <sup>2</sup> | 1 |   |   |  |
| Nausea                                                  | 130 mg/m <sup>2</sup> | 1 |   |   |  |
|                                                         | 165 mg/m <sup>2</sup> | 1 |   |   |  |
|                                                         | 215 mg/m <sup>2</sup> | 1 | 1 |   |  |
|                                                         | 280 mg/m <sup>2</sup> | 3 |   |   |  |
| Non-cardiac chest pain                                  | 165 mg/m <sup>2</sup> | 1 |   |   |  |
| Pain                                                    | 280 mg/m <sup>2</sup> |   |   | 1 |  |
| Pain in extremity                                       | 280 mg/m <sup>2</sup> |   | 2 |   |  |
| Personality change                                      | 215 mg/m <sup>2</sup> | 1 |   |   |  |
| Postnasal drip                                          | 215 mg/m <sup>2</sup> | 1 |   |   |  |
| Renal and urinary disorders - Other, specify (Polyuria) | 280 mg/m <sup>2</sup> | 1 |   |   |  |

|                                                                                                |                       |   |   |  |  |
|------------------------------------------------------------------------------------------------|-----------------------|---|---|--|--|
| Respiratory, thoracic and mediastinal disorders - Other, specify (upper respiratory infection) | 165 mg/m <sup>2</sup> | 1 |   |  |  |
| Respiratory, thoracic and mediastinal disorders - Other, specify (rhinorrhea)                  | 280 mg/m <sup>2</sup> | 1 |   |  |  |
| Scalp pain                                                                                     | 280 mg/m <sup>2</sup> | 1 |   |  |  |
| Sinus tachycardia                                                                              | 165 mg/m <sup>2</sup> | 1 |   |  |  |
| Toothache                                                                                      | 280 mg/m <sup>2</sup> | 1 |   |  |  |
| Tremor                                                                                         | 280 mg/m <sup>2</sup> | 1 |   |  |  |
| Vomiting                                                                                       | 165 mg/m <sup>2</sup> | 2 |   |  |  |
|                                                                                                | 215 mg/m <sup>2</sup> | 1 | 1 |  |  |
|                                                                                                | 280 mg/m <sup>2</sup> | 2 |   |  |  |
| Watering eyes                                                                                  | 165 mg/m <sup>2</sup> | 1 |   |  |  |
| Weight loss                                                                                    | 165 mg/m <sup>2</sup> | 1 |   |  |  |
|                                                                                                | 280 mg/m <sup>2</sup> | 1 |   |  |  |

Maximum grade of Toxicities by Stratum, Irrespective of Attribution, Observed in Patients across All Cycles of Treatment (Excluding Follow-up). Total Patient-Cycles=524[MOU1].

| Toxicity Type              | Dose Level            | Maximum grade of patient-toxicity across all cycles |         |         |         |         |
|----------------------------|-----------------------|-----------------------------------------------------|---------|---------|---------|---------|
|                            |                       | Grade 1                                             | Grade 2 | Grade 3 | Grade 4 | Grade 5 |
| <b>Stratum A1</b>          |                       | <b>Total Number of Patient-Cycles, 208</b>          |         |         |         |         |
| Anemia                     | 100 mg/m <sup>2</sup> | 1                                                   |         |         |         |         |
|                            | 130 mg/m <sup>2</sup> | 1                                                   |         |         |         |         |
|                            | 165 mg/m <sup>2</sup> | 3                                                   | 1       |         |         |         |
|                            | 215 mg/m <sup>2</sup> | 2                                                   | 3       |         |         |         |
|                            | 280 mg/m <sup>2</sup> |                                                     | 1       |         |         |         |
|                            | 365 mg/m <sup>2</sup> | 3                                                   | 1       |         |         |         |
| Lymphocyte count decreased | 130 mg/m <sup>2</sup> | 1                                                   | 1       |         | 1       |         |
|                            | 165 mg/m <sup>2</sup> | 2                                                   | 2       |         |         |         |
|                            | 215 mg/m <sup>2</sup> | 2                                                   | 1       | 1       |         |         |
|                            | 280 mg/m <sup>2</sup> | 2                                                   |         |         |         |         |
|                            | 365 mg/m <sup>2</sup> | 4                                                   |         |         |         |         |
| Neutrophil count decreased | 130 mg/m <sup>2</sup> |                                                     |         |         | 1       |         |
|                            | 165 mg/m <sup>2</sup> | 1                                                   | 1       | 2       |         |         |
|                            | 215 mg/m <sup>2</sup> | 1                                                   |         | 3       |         |         |
|                            | 280 mg/m <sup>2</sup> | 1                                                   | 1       | 1       |         |         |
|                            | 365 mg/m <sup>2</sup> |                                                     | 1       | 3       | 2       |         |
| Platelet count decreased   | 100 mg/m <sup>2</sup> | 1                                                   |         |         |         |         |
|                            | 130 mg/m <sup>2</sup> | 2                                                   |         |         |         |         |

|                                                 |                       |   |   |   |   |   |
|-------------------------------------------------|-----------------------|---|---|---|---|---|
| White blood cell decreased                      | 130 mg/m <sup>2</sup> |   |   | 1 |   |   |
|                                                 | 165 mg/m <sup>2</sup> | 1 | 2 |   |   |   |
|                                                 | 215 mg/m <sup>2</sup> | 3 | 1 |   |   |   |
|                                                 | 280 mg/m <sup>2</sup> | 2 | 1 |   |   |   |
|                                                 | 365 mg/m <sup>2</sup> | 1 | 3 | 1 |   |   |
| Abdominal distension                            | 130 mg/m <sup>2</sup> |   | 1 |   |   |   |
|                                                 | 165 mg/m <sup>2</sup> | 1 |   |   |   |   |
|                                                 | 280 mg/m <sup>2</sup> | 1 |   |   |   |   |
|                                                 | 365 mg/m <sup>2</sup> | 1 |   |   |   |   |
| Abdominal pain                                  | 100 mg/m <sup>2</sup> | 2 |   |   |   |   |
|                                                 | 130 mg/m <sup>2</sup> |   | 1 |   |   |   |
|                                                 | 165 mg/m <sup>2</sup> | 3 |   |   |   |   |
|                                                 | 215 mg/m <sup>2</sup> |   | 1 |   |   |   |
|                                                 | 280 mg/m <sup>2</sup> | 3 |   |   |   |   |
|                                                 | 365 mg/m <sup>2</sup> | 1 |   |   |   |   |
| Abducens nerve disorder                         | 165 mg/m <sup>2</sup> |   |   | 1 |   |   |
| Acidosis                                        | 130 mg/m <sup>2</sup> | 1 |   |   |   |   |
|                                                 | 165 mg/m <sup>2</sup> | 1 |   |   |   |   |
| Activated partial thromboplastin time prolonged | 215 mg/m <sup>2</sup> |   |   | 1 |   |   |
| Agitation                                       | 165 mg/m <sup>2</sup> | 1 |   |   |   |   |
|                                                 | 280 mg/m <sup>2</sup> | 1 |   |   |   |   |
| Alanine aminotransferase increased              | 100 mg/m <sup>2</sup> | 3 |   |   |   |   |
|                                                 | 130 mg/m <sup>2</sup> |   | 1 | 1 |   |   |
|                                                 | 165 mg/m <sup>2</sup> | 5 | 1 |   |   |   |
|                                                 | 215 mg/m <sup>2</sup> | 4 | 1 |   |   |   |
|                                                 | 280 mg/m <sup>2</sup> | 4 | 1 |   |   |   |
|                                                 | 365 mg/m <sup>2</sup> | 4 | 1 |   |   | 1 |
| Alkaline phosphatase increased                  | 130 mg/m <sup>2</sup> | 1 |   |   |   |   |
|                                                 | 165 mg/m <sup>2</sup> |   | 1 | 1 |   |   |
|                                                 | 215 mg/m <sup>2</sup> | 3 |   |   |   |   |
|                                                 | 280 mg/m <sup>2</sup> | 2 |   |   |   |   |
|                                                 | 365 mg/m <sup>2</sup> | 1 |   |   | 2 |   |
| Allergic rhinitis                               | 100 mg/m <sup>2</sup> | 1 | 1 |   |   |   |
|                                                 | 165 mg/m <sup>2</sup> | 2 |   |   |   |   |
| Alopecia                                        | 365 mg/m <sup>2</sup> | 2 |   |   |   |   |
| Amnesia                                         | 280 mg/m <sup>2</sup> | 1 |   |   |   |   |
| Anaphylaxis                                     | 215 mg/m <sup>2</sup> |   |   | 1 |   |   |
| Anorexia                                        | 215 mg/m <sup>2</sup> | 3 |   |   |   |   |
|                                                 | 280 mg/m <sup>2</sup> | 1 |   |   |   |   |
|                                                 | 365 mg/m <sup>2</sup> | 1 | 2 |   |   |   |

|                                                                                  |                       |   |   |   |   |  |
|----------------------------------------------------------------------------------|-----------------------|---|---|---|---|--|
| Anxiety                                                                          | 165 mg/m <sup>2</sup> |   |   | 1 |   |  |
|                                                                                  | 215 mg/m <sup>2</sup> | 1 |   |   |   |  |
| Arthralgia                                                                       | 100 mg/m <sup>2</sup> | 1 |   |   |   |  |
|                                                                                  | 165 mg/m <sup>2</sup> | 1 |   |   |   |  |
|                                                                                  | 215 mg/m <sup>2</sup> |   | 1 |   |   |  |
| Aspartate aminotransferase increased                                             | 100 mg/m <sup>2</sup> | 3 |   |   |   |  |
|                                                                                  | 130 mg/m <sup>2</sup> | 1 | 1 |   |   |  |
|                                                                                  | 165 mg/m <sup>2</sup> | 6 |   |   |   |  |
|                                                                                  | 215 mg/m <sup>2</sup> | 5 | 2 |   |   |  |
|                                                                                  | 280 mg/m <sup>2</sup> | 2 | 1 |   |   |  |
|                                                                                  | 365 mg/m <sup>2</sup> | 4 |   |   | 1 |  |
| Ataxia                                                                           | 165 mg/m <sup>2</sup> |   |   | 1 |   |  |
| Back pain                                                                        | 130 mg/m <sup>2</sup> | 1 |   |   |   |  |
|                                                                                  | 215 mg/m <sup>2</sup> | 1 |   |   |   |  |
|                                                                                  | 365 mg/m <sup>2</sup> |   | 1 |   |   |  |
| Bloating                                                                         | 365 mg/m <sup>2</sup> | 1 |   |   |   |  |
| Blood and lymphatic system disorders - Other, specify (cervical lymphadenopathy) | 165 mg/m <sup>2</sup> | 1 |   |   |   |  |
| Blood and lymphatic system disorders - Other, specify (Lymphadenopathy)          | 280 mg/m <sup>2</sup> | 1 |   |   |   |  |
| Blood bilirubin increased                                                        | 100 mg/m <sup>2</sup> | 1 |   |   |   |  |
|                                                                                  | 165 mg/m <sup>2</sup> | 1 |   |   |   |  |
| Blurred vision                                                                   | 130 mg/m <sup>2</sup> |   | 1 |   |   |  |
|                                                                                  | 165 mg/m <sup>2</sup> | 1 |   |   |   |  |
|                                                                                  | 215 mg/m <sup>2</sup> | 2 |   |   |   |  |
|                                                                                  | 280 mg/m <sup>2</sup> | 2 |   |   |   |  |
| Bone pain                                                                        | 215 mg/m <sup>2</sup> | 1 |   |   |   |  |
| Bronchospasm                                                                     | 100 mg/m <sup>2</sup> | 1 | 1 |   |   |  |
| Bruising                                                                         | 100 mg/m <sup>2</sup> | 1 |   |   |   |  |
|                                                                                  | 365 mg/m <sup>2</sup> | 1 |   |   |   |  |
| Buttock pain                                                                     | 165 mg/m <sup>2</sup> | 1 |   |   |   |  |
|                                                                                  | 215 mg/m <sup>2</sup> | 1 |   |   |   |  |
| Cheilitis                                                                        | 165 mg/m <sup>2</sup> | 1 |   |   |   |  |
| Chills                                                                           | 215 mg/m <sup>2</sup> | 1 |   |   |   |  |
| Chronic kidney disease                                                           | 215 mg/m <sup>2</sup> |   | 1 |   |   |  |
| Constipation                                                                     | 130 mg/m <sup>2</sup> | 1 |   |   |   |  |
|                                                                                  | 165 mg/m <sup>2</sup> |   | 1 |   |   |  |
|                                                                                  | 215 mg/m <sup>2</sup> | 3 |   |   |   |  |
|                                                                                  | 280 mg/m <sup>2</sup> | 2 |   |   |   |  |

|                                  |                       |   |   |   |   |  |
|----------------------------------|-----------------------|---|---|---|---|--|
|                                  | 365 mg/m <sup>2</sup> | 1 |   |   |   |  |
| Cough                            | 100 mg/m <sup>2</sup> | 3 |   |   |   |  |
|                                  | 130 mg/m <sup>2</sup> | 1 |   |   |   |  |
|                                  | 165 mg/m <sup>2</sup> | 4 |   |   |   |  |
|                                  | 215 mg/m <sup>2</sup> |   | 1 |   |   |  |
|                                  | 280 mg/m <sup>2</sup> | 2 |   |   |   |  |
|                                  | 365 mg/m <sup>2</sup> | 1 |   |   |   |  |
| Creatinine increased             | 100 mg/m <sup>2</sup> | 1 | 1 |   |   |  |
|                                  | 130 mg/m <sup>2</sup> | 1 |   |   |   |  |
|                                  | 165 mg/m <sup>2</sup> | 1 |   |   |   |  |
|                                  | 215 mg/m <sup>2</sup> | 3 |   |   |   |  |
|                                  | 280 mg/m <sup>2</sup> | 2 | 1 |   |   |  |
|                                  | 365 mg/m <sup>2</sup> | 2 | 1 |   |   |  |
| Cushingoid                       | 165 mg/m <sup>2</sup> |   | 1 |   |   |  |
| Dehydration                      | 100 mg/m <sup>2</sup> |   | 1 |   |   |  |
|                                  | 130 mg/m <sup>2</sup> |   | 1 |   |   |  |
|                                  | 215 mg/m <sup>2</sup> | 1 |   |   |   |  |
| Depressed level of consciousness | 130 mg/m <sup>2</sup> |   | 1 |   |   |  |
| Depression                       | 215 mg/m <sup>2</sup> | 1 |   |   |   |  |
| Diarrhea                         | 100 mg/m <sup>2</sup> | 1 |   |   |   |  |
|                                  | 130 mg/m <sup>2</sup> | 1 | 1 |   |   |  |
|                                  | 165 mg/m <sup>2</sup> | 3 |   | 1 |   |  |
|                                  | 215 mg/m <sup>2</sup> | 1 | 2 |   |   |  |
|                                  | 280 mg/m <sup>2</sup> | 2 |   | 2 |   |  |
|                                  | 365 mg/m <sup>2</sup> | 5 | 1 |   |   |  |
| Dizziness                        | 165 mg/m <sup>2</sup> | 2 |   |   |   |  |
|                                  | 215 mg/m <sup>2</sup> | 1 |   | 1 |   |  |
|                                  | 280 mg/m <sup>2</sup> | 1 |   |   |   |  |
|                                  | 365 mg/m <sup>2</sup> | 2 |   |   |   |  |
| Dry eye                          | 100 mg/m <sup>2</sup> |   | 1 |   |   |  |
| Dry skin                         | 165 mg/m <sup>2</sup> | 1 |   |   |   |  |
|                                  | 280 mg/m <sup>2</sup> | 1 |   |   |   |  |
|                                  | 365 mg/m <sup>2</sup> | 1 |   |   |   |  |
| Dysgeusia                        | 100 mg/m <sup>2</sup> | 1 |   |   |   |  |
|                                  | 215 mg/m <sup>2</sup> | 2 |   |   |   |  |
|                                  | 365 mg/m <sup>2</sup> | 1 |   |   |   |  |
| Dyspepsia                        | 100 mg/m <sup>2</sup> | 1 |   |   |   |  |
|                                  | 165 mg/m <sup>2</sup> |   | 1 |   |   |  |
| Dysphagia                        | 165 mg/m <sup>2</sup> |   | 1 |   |   |  |
| Dysphasia                        | 165 mg/m <sup>2</sup> |   |   | 1 |   |  |
| Dyspnea                          | 165 mg/m <sup>2</sup> | 1 |   |   | 1 |  |

|                                                                   |                       |   |   |   |  |  |
|-------------------------------------------------------------------|-----------------------|---|---|---|--|--|
|                                                                   | 365 mg/m <sup>2</sup> |   |   | 1 |  |  |
| Edema limbs                                                       | 130 mg/m <sup>2</sup> | 1 |   |   |  |  |
|                                                                   | 165 mg/m <sup>2</sup> |   | 1 |   |  |  |
|                                                                   | 280 mg/m <sup>2</sup> | 1 |   |   |  |  |
| Epistaxis                                                         | 165 mg/m <sup>2</sup> | 1 |   |   |  |  |
| Esophagitis                                                       | 215 mg/m <sup>2</sup> | 1 |   |   |  |  |
|                                                                   | 365 mg/m <sup>2</sup> |   | 1 |   |  |  |
| Euphoria                                                          | 165 mg/m <sup>2</sup> | 1 |   |   |  |  |
| Extraocular muscle paresis                                        | 130 mg/m <sup>2</sup> |   | 1 |   |  |  |
| Eye disorders - Other, specify (Difficulty with color perception) | 100 mg/m <sup>2</sup> | 1 |   |   |  |  |
| Eye disorders - Other, specify (farsighted with astigmatism)      | 130 mg/m <sup>2</sup> |   | 1 |   |  |  |
|                                                                   | 165 mg/m <sup>2</sup> | 1 |   |   |  |  |
|                                                                   | 215 mg/m <sup>2</sup> | 1 |   |   |  |  |
|                                                                   | 215 mg/m <sup>2</sup> |   | 1 |   |  |  |
|                                                                   | 365 mg/m <sup>2</sup> | 1 |   |   |  |  |
|                                                                   | 365 mg/m <sup>2</sup> | 1 |   |   |  |  |
|                                                                   | 365 mg/m <sup>2</sup> | 1 |   |   |  |  |
| Eye pain                                                          | 165 mg/m <sup>2</sup> | 1 |   |   |  |  |
|                                                                   | 280 mg/m <sup>2</sup> | 1 |   |   |  |  |
| Facial nerve disorder                                             | 165 mg/m <sup>2</sup> |   |   | 1 |  |  |
| Fatigue                                                           | 100 mg/m <sup>2</sup> | 1 |   |   |  |  |
|                                                                   | 130 mg/m <sup>2</sup> | 1 |   |   |  |  |
|                                                                   | 165 mg/m <sup>2</sup> | 3 |   | 1 |  |  |
|                                                                   | 215 mg/m <sup>2</sup> | 7 |   |   |  |  |
|                                                                   | 280 mg/m <sup>2</sup> | 2 |   |   |  |  |
|                                                                   | 365 mg/m <sup>2</sup> | 2 | 1 |   |  |  |
| Febrile neutropenia                                               | 100 mg/m <sup>2</sup> |   |   | 1 |  |  |
| Fever                                                             | 130 mg/m <sup>2</sup> | 1 |   |   |  |  |
|                                                                   | 165 mg/m <sup>2</sup> | 1 |   |   |  |  |
|                                                                   | 215 mg/m <sup>2</sup> | 1 |   |   |  |  |
|                                                                   | 280 mg/m <sup>2</sup> | 1 |   |   |  |  |
|                                                                   | 365 mg/m <sup>2</sup> |   | 1 |   |  |  |
| Flashing lights                                                   | 130 mg/m <sup>2</sup> |   | 1 |   |  |  |
|                                                                   | 215 mg/m <sup>2</sup> | 1 |   |   |  |  |
| Flatulence                                                        | 165 mg/m <sup>2</sup> | 2 |   |   |  |  |
|                                                                   | 215 mg/m <sup>2</sup> | 1 |   |   |  |  |

|                                                                  |                       |   |   |   |   |  |
|------------------------------------------------------------------|-----------------------|---|---|---|---|--|
| Floaters                                                         | 365 mg/m <sup>2</sup> | 2 |   |   |   |  |
| Flushing                                                         | 165 mg/m <sup>2</sup> |   | 1 |   |   |  |
|                                                                  | 280 mg/m <sup>2</sup> | 1 |   |   |   |  |
| Gait disturbance                                                 | 365 mg/m <sup>2</sup> | 1 |   |   |   |  |
| Gastrointestinal disorders - Other, specify (Abdominal Cramping) | 215 mg/m <sup>2</sup> | 1 |   |   |   |  |
| GGT increased                                                    | 100 mg/m <sup>2</sup> | 1 |   |   |   |  |
|                                                                  | 130 mg/m <sup>2</sup> |   | 1 |   |   |  |
|                                                                  | 280 mg/m <sup>2</sup> | 1 |   |   |   |  |
|                                                                  | 365 mg/m <sup>2</sup> | 1 |   |   | 1 |  |
| Headache                                                         | 100 mg/m <sup>2</sup> | 1 |   |   |   |  |
|                                                                  | 130 mg/m <sup>2</sup> |   |   | 1 |   |  |
|                                                                  | 165 mg/m <sup>2</sup> | 3 |   |   |   |  |
|                                                                  | 215 mg/m <sup>2</sup> | 1 | 2 |   |   |  |
|                                                                  | 365 mg/m <sup>2</sup> | 3 |   |   |   |  |
| Hematuria                                                        | 280 mg/m <sup>2</sup> | 1 |   |   |   |  |
| Hemoglobinuria                                                   | 165 mg/m <sup>2</sup> | 1 |   |   |   |  |
| Hot flashes                                                      | 130 mg/m <sup>2</sup> |   | 1 |   |   |  |
| Hypercalcemia                                                    | 280 mg/m <sup>2</sup> | 1 |   |   |   |  |
|                                                                  | 365 mg/m <sup>2</sup> | 1 |   |   |   |  |
| Hyperglycemia                                                    | 100 mg/m <sup>2</sup> | 2 |   |   |   |  |
|                                                                  | 165 mg/m <sup>2</sup> | 1 | 3 |   |   |  |
|                                                                  | 215 mg/m <sup>2</sup> |   | 1 |   |   |  |
|                                                                  | 365 mg/m <sup>2</sup> | 3 |   |   |   |  |
| Hyperkalemia                                                     | 130 mg/m <sup>2</sup> | 1 |   |   |   |  |
|                                                                  | 165 mg/m <sup>2</sup> | 2 |   |   |   |  |
| Hypermagnesemia                                                  | 130 mg/m <sup>2</sup> | 2 |   |   |   |  |
|                                                                  | 165 mg/m <sup>2</sup> | 1 |   |   |   |  |
|                                                                  | 215 mg/m <sup>2</sup> | 2 |   |   |   |  |
|                                                                  | 365 mg/m <sup>2</sup> | 2 |   |   |   |  |
| Hypernatremia                                                    | 100 mg/m <sup>2</sup> | 1 |   |   |   |  |
|                                                                  | 365 mg/m <sup>2</sup> | 1 |   |   |   |  |
| Hypertension                                                     | 165 mg/m <sup>2</sup> |   | 1 |   |   |  |
| Hyperuricemia                                                    | 365 mg/m <sup>2</sup> | 1 |   |   |   |  |
| Hypoalbuminemia                                                  | 100 mg/m <sup>2</sup> | 1 | 1 |   |   |  |
|                                                                  | 130 mg/m <sup>2</sup> | 1 |   |   |   |  |
|                                                                  | 165 mg/m <sup>2</sup> | 2 |   |   |   |  |
|                                                                  | 215 mg/m <sup>2</sup> | 3 |   |   |   |  |
|                                                                  | 280 mg/m <sup>2</sup> | 2 |   |   |   |  |
|                                                                  | 365 mg/m <sup>2</sup> | 4 |   |   |   |  |
| Hypocalcemia                                                     | 100 mg/m <sup>2</sup> | 1 |   |   |   |  |



|                                                                                                                                              |                       |   |   |   |   |  |
|----------------------------------------------------------------------------------------------------------------------------------------------|-----------------------|---|---|---|---|--|
|                                                                                                                                              | 130 mg/m <sup>2</sup> | 2 |   |   |   |  |
|                                                                                                                                              | 165 mg/m <sup>2</sup> | 3 |   |   |   |  |
|                                                                                                                                              | 215 mg/m <sup>2</sup> | 1 | 1 |   |   |  |
|                                                                                                                                              | 280 mg/m <sup>2</sup> | 1 |   |   |   |  |
|                                                                                                                                              | 365 mg/m <sup>2</sup> | 2 |   |   |   |  |
| Hypoglycemia                                                                                                                                 | 100 mg/m <sup>2</sup> | 1 | 1 |   |   |  |
|                                                                                                                                              | 215 mg/m <sup>2</sup> |   | 1 |   |   |  |
|                                                                                                                                              | 365 mg/m <sup>2</sup> | 2 | 1 |   |   |  |
| Hypokalemia                                                                                                                                  | 100 mg/m <sup>2</sup> | 1 |   |   |   |  |
|                                                                                                                                              | 130 mg/m <sup>2</sup> | 2 |   |   |   |  |
|                                                                                                                                              | 165 mg/m <sup>2</sup> | 1 |   |   |   |  |
| Hypomagnesemia                                                                                                                               | 165 mg/m <sup>2</sup> | 1 |   |   |   |  |
|                                                                                                                                              | 365 mg/m <sup>2</sup> | 1 |   |   |   |  |
| Hyponatremia                                                                                                                                 | 100 mg/m <sup>2</sup> | 1 |   |   |   |  |
|                                                                                                                                              | 130 mg/m <sup>2</sup> | 1 |   |   |   |  |
|                                                                                                                                              | 165 mg/m <sup>2</sup> | 2 |   |   |   |  |
|                                                                                                                                              | 280 mg/m <sup>2</sup> | 1 |   |   |   |  |
|                                                                                                                                              | 365 mg/m <sup>2</sup> | 1 |   |   |   |  |
| Hypophosphatemia                                                                                                                             | 100 mg/m <sup>2</sup> | 2 |   |   |   |  |
|                                                                                                                                              | 165 mg/m <sup>2</sup> | 1 |   |   |   |  |
|                                                                                                                                              | 215 mg/m <sup>2</sup> | 4 |   |   |   |  |
|                                                                                                                                              | 365 mg/m <sup>2</sup> | 4 |   |   |   |  |
| Hypotension                                                                                                                                  | 100 mg/m <sup>2</sup> | 2 |   |   |   |  |
|                                                                                                                                              | 130 mg/m <sup>2</sup> |   | 1 |   |   |  |
|                                                                                                                                              | 215 mg/m <sup>2</sup> | 2 |   |   |   |  |
|                                                                                                                                              | 280 mg/m <sup>2</sup> | 1 |   |   |   |  |
|                                                                                                                                              | 365 mg/m <sup>2</sup> | 1 |   |   |   |  |
| Hypoxia                                                                                                                                      | 165 mg/m <sup>2</sup> |   |   | 1 |   |  |
| Ileus                                                                                                                                        | 130 mg/m <sup>2</sup> |   | 1 |   |   |  |
| Infections and infestations<br>- Other, specify (Influenza<br>A)                                                                             | 100 mg/m <sup>2</sup> |   | 1 |   |   |  |
| Infections and infestations<br>- Other, specify (Chest<br>wall bacterial cellulitis)                                                         | 215 mg/m <sup>2</sup> |   |   | 1 |   |  |
| Infections and infestations<br>- Other, specify (Infection<br>with Grade 3 or 4<br>neutrophils (ANC <1.0 x<br>10e9/L): Urinary tract<br>NOS) | 280 mg/m <sup>2</sup> |   | 1 |   |   |  |
| Insomnia                                                                                                                                     | 215 mg/m <sup>2</sup> | 2 |   |   |   |  |
|                                                                                                                                              | 365 mg/m <sup>2</sup> | 1 |   |   |   |  |
| Intracranial hemorrhage                                                                                                                      | 130 mg/m <sup>2</sup> |   |   |   | 1 |  |
|                                                                                                                                              | 215 mg/m <sup>2</sup> | 1 |   |   |   |  |

|                                                                          |                       |   |   |   |   |  |
|--------------------------------------------------------------------------|-----------------------|---|---|---|---|--|
| Investigations - Other, specify (increased BUN)                          | 130 mg/m <sup>2</sup> | 1 |   |   |   |  |
| Irritability                                                             | 365 mg/m <sup>2</sup> | 2 |   |   |   |  |
| IVth nerve disorder                                                      | 165 mg/m <sup>2</sup> |   |   | 1 |   |  |
| Lipase increased                                                         | 215 mg/m <sup>2</sup> |   |   | 1 |   |  |
| Lower gastrointestinal hemorrhage                                        | 130 mg/m <sup>2</sup> | 1 |   |   |   |  |
| Lung infection                                                           | 130 mg/m <sup>2</sup> |   | 1 |   |   |  |
| Lymph node pain                                                          | 130 mg/m <sup>2</sup> | 1 |   |   |   |  |
| Memory impairment                                                        | 130 mg/m <sup>2</sup> | 1 |   |   |   |  |
| Metabolism and nutrition disorders - Other, specify (Hyperbilirubinemia) | 165 mg/m <sup>2</sup> | 1 |   |   |   |  |
| Mucositis oral                                                           | 165 mg/m <sup>2</sup> | 1 |   |   |   |  |
|                                                                          | 215 mg/m <sup>2</sup> |   | 1 |   |   |  |
| Myalgia                                                                  | 100 mg/m <sup>2</sup> | 1 |   |   |   |  |
| Myositis                                                                 | 365 mg/m <sup>2</sup> |   |   | 1 |   |  |
| Nail loss                                                                | 215 mg/m <sup>2</sup> | 1 |   |   |   |  |
| Nasal congestion                                                         | 165 mg/m <sup>2</sup> | 1 |   |   |   |  |
|                                                                          | 215 mg/m <sup>2</sup> |   | 1 |   |   |  |
| Nausea                                                                   | 100 mg/m <sup>2</sup> | 2 |   |   |   |  |
|                                                                          | 130 mg/m <sup>2</sup> | 3 |   |   |   |  |
|                                                                          | 165 mg/m <sup>2</sup> | 5 |   |   |   |  |
|                                                                          | 215 mg/m <sup>2</sup> | 4 | 1 |   |   |  |
|                                                                          | 280 mg/m <sup>2</sup> | 3 | 1 |   |   |  |
|                                                                          | 365 mg/m <sup>2</sup> | 3 | 2 |   |   |  |
| Nervous system disorders - Other, specify (Nystagmus)                    | 130 mg/m <sup>2</sup> | 1 |   |   |   |  |
| Nervous system disorders - Other, specify (diminished reflexes)          | 165 mg/m <sup>2</sup> | 1 |   |   |   |  |
| Nervous system disorders - Other, specify (presyncope)                   | 280 mg/m <sup>2</sup> |   | 1 |   |   |  |
| Non-cardiac chest pain                                                   | 165 mg/m <sup>2</sup> | 1 | 1 |   |   |  |
|                                                                          | 215 mg/m <sup>2</sup> |   | 1 |   |   |  |
|                                                                          | 365 mg/m <sup>2</sup> | 1 |   |   |   |  |
| Oral pain                                                                | 365 mg/m <sup>2</sup> | 1 |   |   |   |  |
| Otitis media                                                             | 365 mg/m <sup>2</sup> |   | 1 |   |   |  |
| Pain                                                                     | 100 mg/m <sup>2</sup> | 1 |   |   |   |  |
|                                                                          | 165 mg/m <sup>2</sup> | 1 | 1 |   |   |  |
|                                                                          | 215 mg/m <sup>2</sup> |   | 1 |   |   |  |
|                                                                          | 280 mg/m <sup>2</sup> | 1 |   |   |   |  |
|                                                                          | 365 mg/m <sup>2</sup> |   |   |   | 1 |  |

|                                                                             |                       |   |   |   |  |  |
|-----------------------------------------------------------------------------|-----------------------|---|---|---|--|--|
| Pain in extremity                                                           | 100 mg/m <sup>2</sup> | 1 |   |   |  |  |
|                                                                             | 165 mg/m <sup>2</sup> | 1 |   |   |  |  |
|                                                                             | 215 mg/m <sup>2</sup> |   | 1 |   |  |  |
|                                                                             | 280 mg/m <sup>2</sup> | 3 |   |   |  |  |
|                                                                             | 365 mg/m <sup>2</sup> | 2 |   |   |  |  |
| Palpitations                                                                | 165 mg/m <sup>2</sup> |   | 1 |   |  |  |
| Papulopustular rash                                                         | 280 mg/m <sup>2</sup> | 1 |   |   |  |  |
| Periorbital edema                                                           | 165 mg/m <sup>2</sup> | 1 |   |   |  |  |
| Peripheral motor neuropathy                                                 | 100 mg/m <sup>2</sup> | 1 |   |   |  |  |
|                                                                             | 165 mg/m <sup>2</sup> |   |   | 1 |  |  |
| Peripheral sensory neuropathy                                               | 215 mg/m <sup>2</sup> |   | 1 |   |  |  |
| Personality change                                                          | 365 mg/m <sup>2</sup> |   | 1 |   |  |  |
| Pharyngitis                                                                 | 165 mg/m <sup>2</sup> |   | 1 |   |  |  |
| Pharyngolaryngeal pain                                                      | 280 mg/m <sup>2</sup> | 1 |   |   |  |  |
| Photophobia                                                                 | 165 mg/m <sup>2</sup> | 1 |   |   |  |  |
|                                                                             | 280 mg/m <sup>2</sup> | 1 |   |   |  |  |
| Pneumonitis                                                                 | 165 mg/m <sup>2</sup> | 1 |   |   |  |  |
| Productive cough                                                            | 365 mg/m <sup>2</sup> | 1 |   |   |  |  |
| Proteinuria                                                                 | 130 mg/m <sup>2</sup> | 2 |   |   |  |  |
|                                                                             | 165 mg/m <sup>2</sup> | 1 |   |   |  |  |
|                                                                             | 280 mg/m <sup>2</sup> |   | 1 |   |  |  |
|                                                                             | 365 mg/m <sup>2</sup> | 1 |   |   |  |  |
| Pruritus                                                                    | 280 mg/m <sup>2</sup> | 1 |   |   |  |  |
|                                                                             | 365 mg/m <sup>2</sup> | 1 |   |   |  |  |
| Pyramidal tract syndrome                                                    | 165 mg/m <sup>2</sup> | 1 |   |   |  |  |
| Rash acneiform                                                              | 215 mg/m <sup>2</sup> | 1 |   |   |  |  |
| Rash maculo-papular                                                         | 100 mg/m <sup>2</sup> | 1 |   |   |  |  |
|                                                                             | 165 mg/m <sup>2</sup> | 2 |   |   |  |  |
|                                                                             | 280 mg/m <sup>2</sup> | 1 |   |   |  |  |
|                                                                             | 365 mg/m <sup>2</sup> | 1 |   |   |  |  |
| Respiratory, thoracic and mediastinal disorders - Other, specify (crackles) | 100 mg/m <sup>2</sup> | 1 |   |   |  |  |
| Respiratory, Other, specify (Upper Respiratory Infection Symptoms)          | 130 mg/m <sup>2</sup> | 1 |   |   |  |  |
| Serum amylase increased                                                     | 215 mg/m <sup>2</sup> | 1 |   |   |  |  |
| Sinus bradycardia                                                           | 165 mg/m <sup>2</sup> | 1 |   |   |  |  |
|                                                                             | 215 mg/m <sup>2</sup> | 1 |   |   |  |  |
| Sinus disorder                                                              | 215 mg/m <sup>2</sup> | 2 |   |   |  |  |
| Sinus tachycardia                                                           | 100 mg/m <sup>2</sup> | 1 |   |   |  |  |
|                                                                             | 165 mg/m <sup>2</sup> | 1 |   |   |  |  |

|                                                                                                                |                       |   |   |   |  |  |
|----------------------------------------------------------------------------------------------------------------|-----------------------|---|---|---|--|--|
| Skin and subcutaneous tissue disorders - Other, specify (hair growth noted on face, fine and dark)             | 130 mg/m <sup>2</sup> | 1 |   |   |  |  |
| Skin and subcutaneous tissue disorders - Other, specify (mottled skin)                                         | 165 mg/m <sup>2</sup> | 1 |   |   |  |  |
| Skin and subcutaneous tissue disorders - Other, specify (Abrasions noted on right forearm and right lower leg) | 280 mg/m <sup>2</sup> | 1 |   |   |  |  |
| Skin infection                                                                                                 | 215 mg/m <sup>2</sup> |   |   | 1 |  |  |
|                                                                                                                | 280 mg/m <sup>2</sup> |   | 1 |   |  |  |
| Small intestine infection                                                                                      | 130 mg/m <sup>2</sup> |   | 1 |   |  |  |
| Sore throat                                                                                                    | 165 mg/m <sup>2</sup> | 1 |   |   |  |  |
|                                                                                                                | 280 mg/m <sup>2</sup> | 1 |   |   |  |  |
|                                                                                                                | 365 mg/m <sup>2</sup> | 1 |   |   |  |  |
| Stomach pain                                                                                                   | 100 mg/m <sup>2</sup> | 1 |   |   |  |  |
|                                                                                                                | 365 mg/m <sup>2</sup> | 2 |   |   |  |  |
| Tinnitus                                                                                                       | 215 mg/m <sup>2</sup> |   | 1 |   |  |  |
| Toothache                                                                                                      | 165 mg/m <sup>2</sup> | 1 |   |   |  |  |
| Tumor pain                                                                                                     | 100 mg/m <sup>2</sup> | 1 |   |   |  |  |
| Upper respiratory infection                                                                                    | 100 mg/m <sup>2</sup> |   | 1 |   |  |  |
|                                                                                                                | 165 mg/m <sup>2</sup> |   | 1 | 1 |  |  |
|                                                                                                                | 215 mg/m <sup>2</sup> |   | 1 |   |  |  |
|                                                                                                                | 280 mg/m <sup>2</sup> |   | 1 |   |  |  |
|                                                                                                                | 365 mg/m <sup>2</sup> |   | 1 |   |  |  |
| Urinary frequency                                                                                              | 165 mg/m <sup>2</sup> | 1 |   |   |  |  |
| Urinary incontinence                                                                                           | 165 mg/m <sup>2</sup> | 1 |   |   |  |  |
| Urinary retention                                                                                              | 165 mg/m <sup>2</sup> | 1 |   |   |  |  |
| Urinary tract infection                                                                                        | 130 mg/m <sup>2</sup> |   | 1 |   |  |  |
| Urinary tract pain                                                                                             | 165 mg/m <sup>2</sup> | 1 |   |   |  |  |
| Vaginal infection                                                                                              | 130 mg/m <sup>2</sup> |   | 1 |   |  |  |
| Vomiting                                                                                                       | 100 mg/m <sup>2</sup> | 1 |   |   |  |  |
|                                                                                                                | 130 mg/m <sup>2</sup> | 1 |   | 1 |  |  |
|                                                                                                                | 165 mg/m <sup>2</sup> | 3 | 1 |   |  |  |
|                                                                                                                | 215 mg/m <sup>2</sup> | 3 |   | 1 |  |  |
|                                                                                                                | 280 mg/m <sup>2</sup> | 1 | 1 |   |  |  |
|                                                                                                                | 365 mg/m <sup>2</sup> | 5 |   |   |  |  |
| Watering eyes                                                                                                  | 100 mg/m <sup>2</sup> | 1 |   |   |  |  |
| Weight gain                                                                                                    | 165 mg/m <sup>2</sup> |   | 2 |   |  |  |
| Weight loss                                                                                                    | 100 mg/m <sup>2</sup> | 1 |   |   |  |  |
|                                                                                                                | 165 mg/m <sup>2</sup> | 1 |   |   |  |  |

|                                                 |                       |   |   |   |   |  |
|-------------------------------------------------|-----------------------|---|---|---|---|--|
|                                                 | 215 mg/m <sup>2</sup> | 2 |   |   |   |  |
|                                                 | 280 mg/m <sup>2</sup> | 1 |   |   |   |  |
|                                                 | 365 mg/m <sup>2</sup> | 1 |   |   |   |  |
| Anemia                                          | 100 mg/m <sup>2</sup> |   | 1 |   |   |  |
|                                                 | 165 mg/m <sup>2</sup> | 4 | 2 |   |   |  |
|                                                 | 280 mg/m <sup>2</sup> | 4 | 1 | 1 |   |  |
| Lymphocyte count decreased                      | 100 mg/m <sup>2</sup> |   |   |   | 1 |  |
|                                                 | 165 mg/m <sup>2</sup> | 2 |   | 1 |   |  |
|                                                 | 280 mg/m <sup>2</sup> | 1 |   | 2 |   |  |
| Neutrophil count decreased                      | 100 mg/m <sup>2</sup> |   | 1 |   |   |  |
|                                                 | 165 mg/m <sup>2</sup> | 1 | 4 | 2 | 2 |  |
|                                                 | 215 mg/m <sup>2</sup> |   |   | 1 |   |  |
|                                                 | 280 mg/m <sup>2</sup> | 1 | 1 | 3 | 2 |  |
| Platelet count decreased                        | 100 mg/m <sup>2</sup> | 1 |   |   |   |  |
|                                                 | 165 mg/m <sup>2</sup> | 2 |   |   |   |  |
|                                                 | 215 mg/m <sup>2</sup> | 1 |   |   |   |  |
|                                                 | 280 mg/m <sup>2</sup> | 1 |   |   | 1 |  |
| White blood cell decreased                      | 100 mg/m <sup>2</sup> |   | 1 |   |   |  |
|                                                 | 165 mg/m <sup>2</sup> | 7 | 1 |   |   |  |
|                                                 | 215 mg/m <sup>2</sup> |   |   | 1 |   |  |
|                                                 | 280 mg/m <sup>2</sup> | 2 | 2 | 1 |   |  |
| Abdominal distension                            | 165 mg/m <sup>2</sup> | 1 |   | 1 |   |  |
|                                                 | 280 mg/m <sup>2</sup> | 1 |   |   |   |  |
| Abdominal pain                                  | 165 mg/m <sup>2</sup> | 4 | 1 |   |   |  |
|                                                 | 280 mg/m <sup>2</sup> | 3 |   |   |   |  |
| Acidosis                                        | 165 mg/m <sup>2</sup> | 1 |   |   |   |  |
| Activated partial thromboplastin time prolonged | 165 mg/m <sup>2</sup> | 1 |   |   |   |  |
| Agitation                                       | 165 mg/m <sup>2</sup> | 1 | 2 |   |   |  |
| Alanine aminotransferase increased              | 100 mg/m <sup>2</sup> | 1 |   | 1 |   |  |
|                                                 | 165 mg/m <sup>2</sup> | 6 | 2 |   |   |  |
|                                                 | 215 mg/m <sup>2</sup> | 1 |   |   |   |  |
|                                                 | 280 mg/m <sup>2</sup> | 4 | 2 |   |   |  |
| Alkaline phosphatase increased                  | 165 mg/m <sup>2</sup> | 4 | 1 |   |   |  |
|                                                 | 280 mg/m <sup>2</sup> | 1 |   |   |   |  |
| Allergic reaction                               | 280 mg/m <sup>2</sup> | 1 |   |   |   |  |
| Allergic rhinitis                               | 100 mg/m <sup>2</sup> | 1 |   |   |   |  |
|                                                 | 165 mg/m <sup>2</sup> | 2 |   |   |   |  |
|                                                 | 280 mg/m <sup>2</sup> | 3 |   |   |   |  |
| Alopecia                                        | 100 mg/m <sup>2</sup> | 1 | 1 |   |   |  |
|                                                 | 165 mg/m <sup>2</sup> | 1 |   |   |   |  |

|                                      |                       |   |   |   |  |        |
|--------------------------------------|-----------------------|---|---|---|--|--------|
| Ankle fracture                       | 280 mg/m <sup>2</sup> | 1 |   |   |  |        |
| Anorexia                             | 165 mg/m <sup>2</sup> | 6 | 2 |   |  |        |
|                                      | 280 mg/m <sup>2</sup> | 3 |   |   |  |        |
| Anxiety                              | 165 mg/m <sup>2</sup> | 2 |   |   |  |        |
|                                      | 280 mg/m <sup>2</sup> |   | 1 |   |  |        |
| Arthralgia                           | 165 mg/m <sup>2</sup> | 1 |   |   |  |        |
| Ascites                              | 100 mg/m <sup>2</sup> |   | 1 |   |  |        |
| Aspartate aminotransferase increased | 100 mg/m <sup>2</sup> | 1 |   | 1 |  |        |
|                                      | 165 mg/m <sup>2</sup> | 9 |   |   |  |        |
|                                      | 215 mg/m <sup>2</sup> | 1 |   |   |  |        |
|                                      | 280 mg/m <sup>2</sup> | 5 | 1 | 1 |  |        |
| Ataxia                               | 165 mg/m <sup>2</sup> |   |   | 1 |  |        |
| Atelectasis                          | 280 mg/m <sup>2</sup> |   | 1 |   |  |        |
| Back pain                            | 165 mg/m <sup>2</sup> | 1 | 1 |   |  |        |
|                                      | 215 mg/m <sup>2</sup> | 1 |   |   |  |        |
| Blood bilirubin increased            | 165 mg/m <sup>2</sup> | 1 |   |   |  |        |
| Blurred vision                       | 165 mg/m <sup>2</sup> | 2 |   |   |  |        |
|                                      | 280 mg/m <sup>2</sup> | 3 |   |   |  |        |
| Bone pain                            | 280 mg/m <sup>2</sup> | 1 |   |   |  |        |
| Bruising                             | 165 mg/m <sup>2</sup> | 1 |   |   |  |        |
| Burn                                 | 165 mg/m <sup>2</sup> | 1 |   |   |  |        |
| Catheter related infection           | 165 mg/m <sup>2</sup> |   |   | 2 |  |        |
| Chest wall pain                      | 165 mg/m <sup>2</sup> |   | 1 |   |  |        |
| Chills                               | 165 mg/m <sup>2</sup> | 4 |   |   |  |        |
| Cholesterol high                     | 215 mg/m <sup>2</sup> | 1 |   |   |  |        |
| Chronic kidney disease               | 165 mg/m <sup>2</sup> | 1 |   |   |  |        |
| Conjunctivitis                       | 165 mg/m <sup>2</sup> | 1 | 1 |   |  |        |
| Constipation                         | 165 mg/m <sup>2</sup> | 5 | 1 | 1 |  |        |
|                                      | 215 mg/m <sup>2</sup> | 1 |   |   |  |        |
|                                      | 280 mg/m <sup>2</sup> | 1 |   |   |  |        |
| Cough                                | 100 mg/m <sup>2</sup> | 1 |   |   |  |        |
|                                      | 165 mg/m <sup>2</sup> | 6 | 1 |   |  |        |
|                                      | 215 mg/m <sup>2</sup> | 1 |   |   |  |        |
|                                      | 280 mg/m <sup>2</sup> | 7 |   |   |  |        |
| CPK increased                        | 165 mg/m <sup>2</sup> | 2 |   |   |  |        |
| Creatinine increased                 | 165 mg/m <sup>2</sup> | 7 | 1 | 1 |  |        |
|                                      | 280 mg/m <sup>2</sup> | 1 |   |   |  |        |
| Death NOS                            | 280 mg/m <sup>2</sup> |   |   |   |  | 1[M12] |
| Dehydration                          | 165 mg/m <sup>2</sup> |   | 2 | 1 |  |        |
| Depressed level of consciousness     | 165 mg/m <sup>2</sup> |   | 1 |   |  |        |
| Depression                           | 165 mg/m <sup>2</sup> | 1 | 1 |   |  |        |

|                                                               |                       |   |   |   |  |  |
|---------------------------------------------------------------|-----------------------|---|---|---|--|--|
| Diarrhea                                                      | 100 mg/m <sup>2</sup> | 1 |   |   |  |  |
|                                                               | 165 mg/m <sup>2</sup> | 3 | 5 |   |  |  |
|                                                               | 215 mg/m <sup>2</sup> | 1 |   |   |  |  |
|                                                               | 280 mg/m <sup>2</sup> | 2 | 1 |   |  |  |
| Dizziness                                                     | 165 mg/m <sup>2</sup> | 1 | 2 |   |  |  |
|                                                               | 280 mg/m <sup>2</sup> | 2 |   |   |  |  |
| Dry skin                                                      | 165 mg/m <sup>2</sup> | 1 |   |   |  |  |
|                                                               | 280 mg/m <sup>2</sup> | 1 |   |   |  |  |
| Dyspepsia                                                     | 165 mg/m <sup>2</sup> | 4 |   |   |  |  |
| Dysphasia                                                     | 165 mg/m <sup>2</sup> |   | 1 |   |  |  |
| Dyspnea                                                       | 165 mg/m <sup>2</sup> | 4 |   |   |  |  |
| Ear pain                                                      | 165 mg/m <sup>2</sup> | 1 |   |   |  |  |
|                                                               | 280 mg/m <sup>2</sup> | 1 |   |   |  |  |
| Edema face                                                    | 165 mg/m <sup>2</sup> | 1 |   |   |  |  |
|                                                               | 280 mg/m <sup>2</sup> | 1 |   |   |  |  |
| Edema limbs                                                   | 165 mg/m <sup>2</sup> | 1 |   |   |  |  |
|                                                               | 280 mg/m <sup>2</sup> | 1 | 1 |   |  |  |
| Edema trunk                                                   | 165 mg/m <sup>2</sup> | 1 |   |   |  |  |
| Electrocardiogram QT corrected interval prolonged             | 165 mg/m <sup>2</sup> | 1 |   |   |  |  |
| Enterocolitis infectious                                      | 100 mg/m <sup>2</sup> |   | 1 |   |  |  |
|                                                               | 165 mg/m <sup>2</sup> |   | 1 |   |  |  |
| Epistaxis                                                     | 280 mg/m <sup>2</sup> |   |   | 1 |  |  |
| Erectile dysfunction                                          | 165 mg/m <sup>2</sup> |   | 1 |   |  |  |
| External ear inflammation                                     | 165 mg/m <sup>2</sup> | 1 | 1 |   |  |  |
| External ear pain                                             | 165 mg/m <sup>2</sup> | 1 | 1 |   |  |  |
| Extrapyramidal disorder                                       | 165 mg/m <sup>2</sup> | 1 |   |   |  |  |
| Eye disorders - Other, specify (halos around objects)         | 165 mg/m <sup>2</sup> | 1 |   |   |  |  |
| Eye disorders - Other, specify (Seeing shadows in eye field)  | 165 mg/m <sup>2</sup> | 1 |   |   |  |  |
| Eye disorders - Other, specify (erythma of the sclera)        | 165 mg/m <sup>2</sup> | 1 |   |   |  |  |
| Eye disorders - Other, specify (Conjunctival Irritation)      | 165 mg/m <sup>2</sup> | 1 |   |   |  |  |
| Eye disorders - Other, specify (Blue discoloration to vision) | 165 mg/m <sup>2</sup> |   | 1 |   |  |  |

|                                                                                            |                       |   |   |   |  |  |
|--------------------------------------------------------------------------------------------|-----------------------|---|---|---|--|--|
| Eye disorders - Other, specify (Shadows in peripheral vision, particularly upon waking)    | 280 mg/m <sup>2</sup> | 1 |   |   |  |  |
| Eye disorders - Other, specify (Double vision)                                             | 280 mg/m <sup>2</sup> | 1 |   |   |  |  |
| Eye infection                                                                              | 165 mg/m <sup>2</sup> |   | 1 |   |  |  |
| Eye pain                                                                                   | 280 mg/m <sup>2</sup> | 1 |   |   |  |  |
| Fatigue                                                                                    | 165 mg/m <sup>2</sup> | 3 | 2 |   |  |  |
|                                                                                            | 215 mg/m <sup>2</sup> | 1 |   |   |  |  |
|                                                                                            | 280 mg/m <sup>2</sup> | 3 |   |   |  |  |
| Febrile neutropenia                                                                        | 165 mg/m <sup>2</sup> |   |   | 1 |  |  |
| Fever                                                                                      | 165 mg/m <sup>2</sup> | 4 | 2 | 1 |  |  |
|                                                                                            | 280 mg/m <sup>2</sup> | 2 |   | 1 |  |  |
| Flashing lights                                                                            | 215 mg/m <sup>2</sup> | 1 |   |   |  |  |
| Flatulence                                                                                 | 215 mg/m <sup>2</sup> |   | 1 |   |  |  |
| Floaters                                                                                   | 165 mg/m <sup>2</sup> | 1 |   |   |  |  |
| Flu like symptoms                                                                          | 165 mg/m <sup>2</sup> |   | 1 |   |  |  |
| Flushing                                                                                   | 165 mg/m <sup>2</sup> | 2 |   |   |  |  |
| Fracture                                                                                   | 280 mg/m <sup>2</sup> |   | 2 |   |  |  |
| Gait disturbance                                                                           | 100 mg/m <sup>2</sup> | 1 |   |   |  |  |
|                                                                                            | 280 mg/m <sup>2</sup> | 1 |   |   |  |  |
| Gastrointestinal disorders - Other, specify (cramping)                                     | 215 mg/m <sup>2</sup> | 1 |   |   |  |  |
| Gastrointestinal disorders - Other, specify (gastroenteritis)                              | 280 mg/m <sup>2</sup> | 1 |   |   |  |  |
| General disorders and administration site conditions - Other, specify (Hepatosplenomegaly) | 280 mg/m <sup>2</sup> | 1 |   |   |  |  |
| Generalized muscle weakness                                                                | 165 mg/m <sup>2</sup> |   | 2 |   |  |  |
| GGT increased                                                                              | 165 mg/m <sup>2</sup> | 1 | 1 | 1 |  |  |
|                                                                                            | 280 mg/m <sup>2</sup> |   | 1 |   |  |  |
| Glossopharyngeal nerve disorder                                                            | 165 mg/m <sup>2</sup> | 1 |   |   |  |  |
| Headache                                                                                   | 165 mg/m <sup>2</sup> | 5 | 2 | 1 |  |  |
|                                                                                            | 280 mg/m <sup>2</sup> | 2 |   |   |  |  |
| Hearing impaired                                                                           | 215 mg/m <sup>2</sup> | 1 |   |   |  |  |
| Hemoglobinuria                                                                             | 165 mg/m <sup>2</sup> | 1 |   |   |  |  |
| Hoarseness                                                                                 | 165 mg/m <sup>2</sup> | 1 |   |   |  |  |
| Hot flashes                                                                                | 280 mg/m <sup>2</sup> | 1 |   |   |  |  |
| Hypercalcemia                                                                              | 165 mg/m <sup>2</sup> | 1 |   |   |  |  |



|                                                             |                       |   |   |   |   |  |
|-------------------------------------------------------------|-----------------------|---|---|---|---|--|
| Hyperglycemia                                               | 100 mg/m <sup>2</sup> |   | 1 |   |   |  |
|                                                             | 165 mg/m <sup>2</sup> | 4 | 2 |   |   |  |
|                                                             | 280 mg/m <sup>2</sup> | 3 |   |   |   |  |
| Hyperhidrosis                                               | 165 mg/m <sup>2</sup> | 2 | 1 |   |   |  |
| Hyperkalemia                                                | 165 mg/m <sup>2</sup> | 2 |   |   |   |  |
|                                                             | 280 mg/m <sup>2</sup> | 1 |   |   |   |  |
| Hypermagnesemia                                             | 165 mg/m <sup>2</sup> | 1 |   |   |   |  |
|                                                             | 215 mg/m <sup>2</sup> | 1 |   |   |   |  |
|                                                             | 280 mg/m <sup>2</sup> | 3 |   |   |   |  |
| Hypernatremia                                               | 280 mg/m <sup>2</sup> | 2 |   |   |   |  |
| Hypertension                                                | 165 mg/m <sup>2</sup> | 3 | 2 |   |   |  |
|                                                             | 280 mg/m <sup>2</sup> |   | 1 |   |   |  |
| Hyperuricemia                                               | 165 mg/m <sup>2</sup> | 2 |   |   |   |  |
| Hypoalbuminemia                                             | 100 mg/m <sup>2</sup> | 1 | 1 |   |   |  |
|                                                             | 165 mg/m <sup>2</sup> | 5 | 4 |   |   |  |
|                                                             | 280 mg/m <sup>2</sup> | 2 | 3 |   |   |  |
| Hypocalcemia                                                | 100 mg/m <sup>2</sup> | 1 | 1 |   |   |  |
|                                                             | 165 mg/m <sup>2</sup> | 4 | 6 |   |   |  |
|                                                             | 215 mg/m <sup>2</sup> |   | 1 |   |   |  |
|                                                             | 280 mg/m <sup>2</sup> | 2 | 3 |   |   |  |
| Hypoglycemia                                                | 165 mg/m <sup>2</sup> | 3 |   |   |   |  |
|                                                             | 280 mg/m <sup>2</sup> | 1 |   |   |   |  |
| Hypokalemia                                                 | 100 mg/m <sup>2</sup> | 1 |   |   | 1 |  |
|                                                             | 165 mg/m <sup>2</sup> | 2 |   | 2 |   |  |
|                                                             | 215 mg/m <sup>2</sup> | 1 |   |   |   |  |
|                                                             | 280 mg/m <sup>2</sup> | 1 | 1 |   |   |  |
| Hypomagnesemia                                              | 165 mg/m <sup>2</sup> | 4 |   |   |   |  |
| Hyponatremia                                                | 100 mg/m <sup>2</sup> | 2 |   |   |   |  |
|                                                             | 165 mg/m <sup>2</sup> | 3 |   |   |   |  |
|                                                             | 280 mg/m <sup>2</sup> | 4 |   |   |   |  |
| Hypophosphatemia                                            | 100 mg/m <sup>2</sup> | 1 |   |   |   |  |
|                                                             | 165 mg/m <sup>2</sup> | 3 |   |   |   |  |
|                                                             | 215 mg/m <sup>2</sup> | 1 |   |   |   |  |
|                                                             | 280 mg/m <sup>2</sup> | 1 |   |   |   |  |
| Hypotension                                                 | 165 mg/m <sup>2</sup> | 2 | 2 |   |   |  |
| Hypoxia                                                     | 165 mg/m <sup>2</sup> |   |   | 1 |   |  |
| Immune system disorders<br>- Other, specify (Rhinitis)      | 165 mg/m <sup>2</sup> | 1 |   |   |   |  |
| Immune system disorders<br>- Other, specify (Runny<br>nose) | 165 mg/m <sup>2</sup> | 1 |   |   |   |  |
| Infections and infestations<br>- Other, specify (Sinusitis) | 165 mg/m <sup>2</sup> | 1 |   |   |   |  |

|                                                                                                                              |                       |   |   |   |  |  |
|------------------------------------------------------------------------------------------------------------------------------|-----------------------|---|---|---|--|--|
| Infections and infestations - Other, specify (Infection with Grade 3 or 4 neutrophils (ANC <1.0 x 10e9/L): Mucosa)           | 165 mg/m <sup>2</sup> |   | 1 |   |  |  |
| Infections and infestations - Other, specify (ear infection)                                                                 | 165 mg/m <sup>2</sup> |   | 1 |   |  |  |
| Infections and infestations - Other, specify (Infection with Grade 3 or 4 neutrophils (ANC <1.0 x 10e9/L): Catheter-related) | 165 mg/m <sup>2</sup> |   |   | 1 |  |  |
| Infections and infestations - Other, specify (Disseminated Varicella Zoster)                                                 | 165 mg/m <sup>2</sup> |   |   | 1 |  |  |
| Infections and infestations - Other, specify (Viral gastroenteritis)                                                         | 280 mg/m <sup>2</sup> |   |   | 1 |  |  |
| Insomnia                                                                                                                     | 280 mg/m <sup>2</sup> |   | 1 |   |  |  |
| Investigations - Other, specify (decreased bilirubin)                                                                        | 280 mg/m <sup>2</sup> | 1 |   |   |  |  |
| Investigations - Other, specify (hyperphosphatemia)                                                                          | 280 mg/m <sup>2</sup> | 1 |   |   |  |  |
| Jejunal ulcer                                                                                                                | 100 mg/m <sup>2</sup> |   | 1 |   |  |  |
| Laryngeal inflammation                                                                                                       | 215 mg/m <sup>2</sup> | 1 |   |   |  |  |
| Lip infection                                                                                                                | 280 mg/m <sup>2</sup> | 1 |   |   |  |  |
| Localized edema                                                                                                              | 280 mg/m <sup>2</sup> | 1 |   |   |  |  |
| Lung infection                                                                                                               | 165 mg/m <sup>2</sup> |   | 2 |   |  |  |
|                                                                                                                              | 280 mg/m <sup>2</sup> |   | 1 |   |  |  |
| Malaise                                                                                                                      | 165 mg/m <sup>2</sup> | 1 |   |   |  |  |
| Memory impairment                                                                                                            | 165 mg/m <sup>2</sup> |   | 1 |   |  |  |
| Metabolism and nutrition disorders - Other, specify (increased chloride)                                                     | 280 mg/m <sup>2</sup> | 1 |   |   |  |  |
| Metabolism and nutrition disorders - Other, specify (decreased AN-GAP)                                                       | 280 mg/m <sup>2</sup> | 1 |   |   |  |  |
| Metabolism and nutrition disorders - Other, specify (decreased total protein)                                                | 280 mg/m <sup>2</sup> | 1 |   |   |  |  |
| Metabolism and nutrition disorders - Other, specify (hyperphosphatemia)                                                      | 280 mg/m <sup>2</sup> | 1 |   |   |  |  |
| Mucositis oral                                                                                                               | 165 mg/m <sup>2</sup> | 2 |   |   |  |  |
| Muscle weakness lower limb                                                                                                   | 165 mg/m <sup>2</sup> | 1 |   |   |  |  |
|                                                                                                                              | 280 mg/m <sup>2</sup> | 1 |   |   |  |  |
| Musculoskeletal and connective tissue disorder - Other, specify (muscle spasms- chest)                                       | 165 mg/m <sup>2</sup> |   | 1 |   |  |  |

|                                                                                                     |                       |   |   |   |  |  |
|-----------------------------------------------------------------------------------------------------|-----------------------|---|---|---|--|--|
| Musculoskeletal and connective tissue disorder - Other, specify (muscle stiffness in back)          | 215 mg/m <sup>2</sup> | 1 |   |   |  |  |
| Myalgia                                                                                             | 165 mg/m <sup>2</sup> |   | 1 |   |  |  |
|                                                                                                     | 280 mg/m <sup>2</sup> | 1 |   |   |  |  |
| Nasal congestion                                                                                    | 165 mg/m <sup>2</sup> | 3 |   |   |  |  |
|                                                                                                     | 280 mg/m <sup>2</sup> | 1 |   |   |  |  |
| Nausea                                                                                              | 100 mg/m <sup>2</sup> | 1 |   |   |  |  |
|                                                                                                     | 165 mg/m <sup>2</sup> | 6 | 3 |   |  |  |
|                                                                                                     | 215 mg/m <sup>2</sup> |   | 1 |   |  |  |
|                                                                                                     | 280 mg/m <sup>2</sup> | 7 |   |   |  |  |
| Neoplasms benign, malignant and unspecified (incl cysts and polyps) - Other, specify (Ovarian cyst) | 280 mg/m <sup>2</sup> | 1 |   |   |  |  |
| Neuralgia                                                                                           | 165 mg/m <sup>2</sup> |   |   | 1 |  |  |
| Non-cardiac chest pain                                                                              | 165 mg/m <sup>2</sup> | 3 |   | 1 |  |  |
|                                                                                                     | 280 mg/m <sup>2</sup> | 1 |   |   |  |  |
| Oral hemorrhage                                                                                     | 280 mg/m <sup>2</sup> | 1 |   |   |  |  |
| Oral pain                                                                                           | 280 mg/m <sup>2</sup> | 1 |   |   |  |  |
| Pain                                                                                                | 165 mg/m <sup>2</sup> | 2 | 3 |   |  |  |
|                                                                                                     | 215 mg/m <sup>2</sup> | 1 |   |   |  |  |
|                                                                                                     | 280 mg/m <sup>2</sup> | 3 |   |   |  |  |
| Pain in extremity                                                                                   | 100 mg/m <sup>2</sup> | 1 |   |   |  |  |
|                                                                                                     | 165 mg/m <sup>2</sup> | 1 | 1 |   |  |  |
|                                                                                                     | 280 mg/m <sup>2</sup> | 2 |   | 1 |  |  |
| Pain of skin                                                                                        | 165 mg/m <sup>2</sup> | 1 |   |   |  |  |
| Papilledema                                                                                         | 280 mg/m <sup>2</sup> | 1 |   |   |  |  |
| Papulopustular rash                                                                                 | 165 mg/m <sup>2</sup> | 2 |   |   |  |  |
| Paresthesia                                                                                         | 165 mg/m <sup>2</sup> | 1 |   |   |  |  |
| Pelvic pain                                                                                         | 165 mg/m <sup>2</sup> |   | 1 |   |  |  |
| Penile pain                                                                                         | 165 mg/m <sup>2</sup> | 1 |   |   |  |  |
| Pericardial effusion                                                                                | 165 mg/m <sup>2</sup> |   | 1 |   |  |  |
| Peripheral motor neuropathy                                                                         | 165 mg/m <sup>2</sup> |   | 1 |   |  |  |
| Peripheral sensory neuropathy                                                                       | 165 mg/m <sup>2</sup> |   | 1 |   |  |  |
| Pharyngitis                                                                                         | 165 mg/m <sup>2</sup> |   | 1 |   |  |  |
| Pharyngolaryngeal pain                                                                              | 165 mg/m <sup>2</sup> | 4 | 1 |   |  |  |
| Photophobia                                                                                         | 165 mg/m <sup>2</sup> | 3 |   |   |  |  |
| Pleural effusion                                                                                    | 165 mg/m <sup>2</sup> | 2 |   |   |  |  |
| Pruritus                                                                                            | 165 mg/m <sup>2</sup> | 3 |   |   |  |  |
|                                                                                                     | 280 mg/m <sup>2</sup> | 2 |   |   |  |  |

|                                                                                                             |                       |   |   |   |  |  |
|-------------------------------------------------------------------------------------------------------------|-----------------------|---|---|---|--|--|
| Rash acneiform                                                                                              | 165 mg/m <sup>2</sup> | 1 |   |   |  |  |
| Rash maculo-papular                                                                                         | 165 mg/m <sup>2</sup> | 5 | 1 |   |  |  |
|                                                                                                             | 280 mg/m <sup>2</sup> | 1 | 1 |   |  |  |
| Renal and urinary disorders - Other, specify                                                                | 165 mg/m <sup>2</sup> |   | 1 |   |  |  |
| Respiratory, thoracic and mediastinal disorders - Other, specify (Runny Nose)                               | 165 mg/m <sup>2</sup> | 1 |   |   |  |  |
| Respiratory, thoracic and mediastinal disorders - Other, specify (Upper respiratory infection)              | 280 mg/m <sup>2</sup> | 1 |   |   |  |  |
| Respiratory, thoracic and mediastinal disorders - Other, specify (tachypnea (breaths fast when she sleeps)) | 280 mg/m <sup>2</sup> | 1 |   |   |  |  |
| Rhinitis infective                                                                                          | 280 mg/m <sup>2</sup> | 1 |   |   |  |  |
| Sinus bradycardia                                                                                           | 165 mg/m <sup>2</sup> | 1 |   |   |  |  |
| Sinus tachycardia                                                                                           | 165 mg/m <sup>2</sup> | 4 |   |   |  |  |
| Skin and subcutaneous tissue disorders - Other, specify                                                     | 165 mg/m <sup>2</sup> | 2 |   |   |  |  |
|                                                                                                             | 280 mg/m <sup>2</sup> | 1 |   |   |  |  |
| Skin induration                                                                                             | 165 mg/m <sup>2</sup> | 1 |   |   |  |  |
| Skin infection                                                                                              | 165 mg/m <sup>2</sup> |   | 1 |   |  |  |
| Skin ulceration                                                                                             | 165 mg/m <sup>2</sup> |   | 1 |   |  |  |
| Sneezing                                                                                                    | 280 mg/m <sup>2</sup> | 1 |   |   |  |  |
| Sore throat                                                                                                 | 165 mg/m <sup>2</sup> | 3 |   |   |  |  |
|                                                                                                             | 280 mg/m <sup>2</sup> | 1 | 1 |   |  |  |
| Stomach pain                                                                                                | 165 mg/m <sup>2</sup> | 2 |   |   |  |  |
|                                                                                                             | 280 mg/m <sup>2</sup> | 1 |   |   |  |  |
| Supraventricular tachycardia                                                                                | 165 mg/m <sup>2</sup> | 1 |   |   |  |  |
| Testicular pain                                                                                             | 165 mg/m <sup>2</sup> | 1 |   |   |  |  |
| Toothache                                                                                                   | 280 mg/m <sup>2</sup> | 1 |   |   |  |  |
| Tremor                                                                                                      | 165 mg/m <sup>2</sup> | 1 |   |   |  |  |
| Upper respiratory infection                                                                                 | 165 mg/m <sup>2</sup> |   | 5 |   |  |  |
|                                                                                                             | 280 mg/m <sup>2</sup> |   | 1 |   |  |  |
| Urinary tract infection                                                                                     | 280 mg/m <sup>2</sup> |   | 1 |   |  |  |
| Urinary tract pain                                                                                          | 280 mg/m <sup>2</sup> | 1 |   |   |  |  |
| Urticaria                                                                                                   | 280 mg/m <sup>2</sup> | 1 |   |   |  |  |
| Vascular access complication                                                                                | 280 mg/m <sup>2</sup> |   | 1 |   |  |  |
| Vomiting                                                                                                    | 100 mg/m <sup>2</sup> | 1 |   |   |  |  |
|                                                                                                             | 165 mg/m <sup>2</sup> | 4 | 6 | 1 |  |  |
|                                                                                                             | 215 mg/m <sup>2</sup> | 1 |   |   |  |  |

|                                      |                                           |   |   |   |   |  |
|--------------------------------------|-------------------------------------------|---|---|---|---|--|
|                                      | 280 mg/m <sup>2</sup>                     | 6 | 2 |   |   |  |
| Watering eyes                        | 280 mg/m <sup>2</sup>                     | 1 |   |   |   |  |
| Weight gain                          | 165 mg/m <sup>2</sup>                     |   | 2 | 1 |   |  |
|                                      | 280 mg/m <sup>2</sup>                     | 1 | 1 |   |   |  |
| Weight loss                          | 165 mg/m <sup>2</sup>                     | 2 |   |   |   |  |
|                                      | 280 mg/m <sup>2</sup>                     |   | 1 |   |   |  |
| Wheezing                             | 165 mg/m <sup>2</sup>                     |   | 1 |   |   |  |
| <b>Stratum A3</b>                    | <b>Total Number of Patient-Cycles, 52</b> |   |   |   |   |  |
| Anemia                               | 165 mg/m <sup>2</sup>                     |   | 1 | 1 |   |  |
|                                      | 215 mg/m <sup>2</sup>                     | 1 |   |   |   |  |
| Lymphocyte count decreased           | 165 mg/m <sup>2</sup>                     |   |   | 1 |   |  |
|                                      | 215 mg/m <sup>2</sup>                     | 1 |   |   |   |  |
| Neutrophil count decreased           | 165 mg/m <sup>2</sup>                     |   | 1 |   |   |  |
|                                      | 215 mg/m <sup>2</sup>                     |   | 1 |   | 1 |  |
| Platelet count decreased             | 165 mg/m <sup>2</sup>                     | 1 | 1 |   |   |  |
| White blood cell decreased           | 165 mg/m <sup>2</sup>                     | 2 |   |   |   |  |
|                                      | 215 mg/m <sup>2</sup>                     | 2 |   |   |   |  |
| Abdominal distension                 | 280 mg/m <sup>2</sup>                     | 1 |   |   |   |  |
| Abdominal pain                       | 280 mg/m <sup>2</sup>                     | 1 |   |   |   |  |
| Acidosis                             | 165 mg/m <sup>2</sup>                     | 1 |   |   |   |  |
| Agitation                            | 165 mg/m <sup>2</sup>                     | 1 |   |   |   |  |
| Alanine aminotransferase increased   | 165 mg/m <sup>2</sup>                     | 2 | 1 |   |   |  |
|                                      | 215 mg/m <sup>2</sup>                     | 3 |   |   |   |  |
|                                      | 280 mg/m <sup>2</sup>                     | 1 |   | 1 |   |  |
| Alkaline phosphatase increased       | 165 mg/m <sup>2</sup>                     | 1 |   |   |   |  |
|                                      | 215 mg/m <sup>2</sup>                     | 2 |   |   |   |  |
| Allergic reaction                    | 165 mg/m <sup>2</sup>                     |   | 1 |   |   |  |
| Anorexia                             | 215 mg/m <sup>2</sup>                     | 2 |   |   |   |  |
|                                      | 280 mg/m <sup>2</sup>                     | 2 |   |   |   |  |
| Arthralgia                           | 165 mg/m <sup>2</sup>                     | 1 |   |   |   |  |
| Aspartate aminotransferase increased | 165 mg/m <sup>2</sup>                     | 1 | 1 |   |   |  |
|                                      | 215 mg/m <sup>2</sup>                     | 3 |   |   |   |  |
|                                      | 280 mg/m <sup>2</sup>                     | 1 |   | 1 |   |  |
| Back pain                            | 280 mg/m <sup>2</sup>                     | 1 |   |   |   |  |
| Blurred vision                       | 130 mg/m <sup>2</sup>                     | 1 |   |   |   |  |
|                                      | 165 mg/m <sup>2</sup>                     | 1 |   |   |   |  |
|                                      | 280 mg/m <sup>2</sup>                     | 2 |   |   |   |  |
| Bone marrow hypocellular             | 165 mg/m <sup>2</sup>                     | 1 |   |   |   |  |
| Bone pain                            | 165 mg/m <sup>2</sup>                     |   |   | 1 |   |  |
| Bruising                             | 215 mg/m <sup>2</sup>                     | 1 |   |   |   |  |
| Burn                                 | 165 mg/m <sup>2</sup>                     | 1 |   |   |   |  |

|                                                 |                       |   |   |   |  |  |
|-------------------------------------------------|-----------------------|---|---|---|--|--|
| Cardiac troponin I increased                    | 215 mg/m <sup>2</sup> | 1 |   |   |  |  |
| Catheter related infection                      | 165 mg/m <sup>2</sup> |   |   | 1 |  |  |
| Chest pain - cardiac                            | 215 mg/m <sup>2</sup> |   | 1 |   |  |  |
| Confusion                                       | 165 mg/m <sup>2</sup> | 1 |   |   |  |  |
|                                                 | 280 mg/m <sup>2</sup> | 1 |   |   |  |  |
| Constipation                                    | 215 mg/m <sup>2</sup> | 1 |   |   |  |  |
|                                                 | 280 mg/m <sup>2</sup> | 1 |   |   |  |  |
| Cough                                           | 165 mg/m <sup>2</sup> | 1 |   |   |  |  |
|                                                 | 215 mg/m <sup>2</sup> | 1 |   |   |  |  |
|                                                 | 280 mg/m <sup>2</sup> | 1 |   |   |  |  |
| CPK increased                                   | 215 mg/m <sup>2</sup> | 1 |   |   |  |  |
| Creatinine increased                            | 165 mg/m <sup>2</sup> | 2 |   |   |  |  |
|                                                 | 215 mg/m <sup>2</sup> | 1 |   |   |  |  |
|                                                 | 280 mg/m <sup>2</sup> | 1 |   |   |  |  |
| Dehydration                                     | 165 mg/m <sup>2</sup> |   |   | 1 |  |  |
| Dental caries                                   | 165 mg/m <sup>2</sup> | 1 |   |   |  |  |
| Diarrhea                                        | 165 mg/m <sup>2</sup> | 1 |   |   |  |  |
|                                                 | 215 mg/m <sup>2</sup> | 2 |   |   |  |  |
|                                                 | 280 mg/m <sup>2</sup> | 2 |   |   |  |  |
| Dry skin                                        | 215 mg/m <sup>2</sup> | 1 |   |   |  |  |
| Dysesthesia                                     | 280 mg/m <sup>2</sup> | 1 |   |   |  |  |
| Dyspepsia                                       | 215 mg/m <sup>2</sup> |   | 1 |   |  |  |
| Dysphagia                                       | 280 mg/m <sup>2</sup> | 1 |   |   |  |  |
| Ear pain                                        | 165 mg/m <sup>2</sup> |   | 1 |   |  |  |
| Edema limbs                                     | 280 mg/m <sup>2</sup> | 1 |   |   |  |  |
| Extraocular muscle paresis                      | 215 mg/m <sup>2</sup> |   | 1 |   |  |  |
| Eye disorders - Other, specify (Jumping vision) | 280 mg/m <sup>2</sup> | 1 |   |   |  |  |
| Eye disorders - Other, specify (seeing trails)  | 280 mg/m <sup>2</sup> | 1 |   |   |  |  |
| Fatigue                                         | 165 mg/m <sup>2</sup> | 1 |   |   |  |  |
|                                                 | 280 mg/m <sup>2</sup> | 3 |   |   |  |  |
| Fever                                           | 165 mg/m <sup>2</sup> |   |   | 1 |  |  |
|                                                 | 215 mg/m <sup>2</sup> | 1 | 1 |   |  |  |
|                                                 | 280 mg/m <sup>2</sup> | 2 |   |   |  |  |
| Flashing lights                                 | 165 mg/m <sup>2</sup> | 1 |   |   |  |  |
| GGT increased                                   | 280 mg/m <sup>2</sup> |   | 1 |   |  |  |
| Hallucinations                                  | 280 mg/m <sup>2</sup> | 1 |   |   |  |  |
| Headache                                        | 165 mg/m <sup>2</sup> | 1 |   |   |  |  |
|                                                 | 215 mg/m <sup>2</sup> | 1 |   |   |  |  |
| Hyperglycemia                                   | 165 mg/m <sup>2</sup> | 2 |   |   |  |  |

|                                                                                                                                          |                       |   |   |   |  |  |
|------------------------------------------------------------------------------------------------------------------------------------------|-----------------------|---|---|---|--|--|
|                                                                                                                                          | 215 mg/m <sup>2</sup> | 1 |   |   |  |  |
|                                                                                                                                          | 280 mg/m <sup>2</sup> | 1 |   |   |  |  |
| Hyperkalemia                                                                                                                             | 165 mg/m <sup>2</sup> | 1 | 1 |   |  |  |
|                                                                                                                                          | 215 mg/m <sup>2</sup> | 1 | 1 |   |  |  |
| Hypermagnesemia                                                                                                                          | 165 mg/m <sup>2</sup> | 1 |   |   |  |  |
|                                                                                                                                          | 215 mg/m <sup>2</sup> | 1 |   |   |  |  |
|                                                                                                                                          | 280 mg/m <sup>2</sup> | 1 |   |   |  |  |
| Hypertension                                                                                                                             | 165 mg/m <sup>2</sup> | 1 | 1 |   |  |  |
| Hypoalbuminemia                                                                                                                          | 165 mg/m <sup>2</sup> | 1 | 1 |   |  |  |
|                                                                                                                                          | 215 mg/m <sup>2</sup> | 1 | 1 |   |  |  |
|                                                                                                                                          | 280 mg/m <sup>2</sup> |   | 1 |   |  |  |
| Hypocalcemia                                                                                                                             | 165 mg/m <sup>2</sup> | 3 |   |   |  |  |
|                                                                                                                                          | 215 mg/m <sup>2</sup> | 2 |   |   |  |  |
|                                                                                                                                          | 280 mg/m <sup>2</sup> |   | 1 |   |  |  |
| Hypoglycemia                                                                                                                             | 280 mg/m <sup>2</sup> | 1 |   |   |  |  |
| Hypokalemia                                                                                                                              | 130 mg/m <sup>2</sup> | 1 |   |   |  |  |
|                                                                                                                                          | 165 mg/m <sup>2</sup> | 1 |   |   |  |  |
|                                                                                                                                          | 215 mg/m <sup>2</sup> | 1 |   |   |  |  |
| Hyponatremia                                                                                                                             | 165 mg/m <sup>2</sup> | 2 |   |   |  |  |
|                                                                                                                                          | 280 mg/m <sup>2</sup> | 2 |   |   |  |  |
| Hypophosphatemia                                                                                                                         | 165 mg/m <sup>2</sup> | 1 |   |   |  |  |
|                                                                                                                                          | 280 mg/m <sup>2</sup> | 1 |   |   |  |  |
| Hypotension                                                                                                                              | 165 mg/m <sup>2</sup> |   | 2 |   |  |  |
| Infections and infestations<br>- Other, specify (ear<br>infection)                                                                       | 165 mg/m <sup>2</sup> |   | 1 |   |  |  |
| Infections and infestations<br>- Other, specify (Infection<br>with Grade 3 or 4<br>neutrophils (ANC <1.0 x<br>10e9/L): Catheter-related) | 165 mg/m <sup>2</sup> |   |   | 1 |  |  |
| Nausea                                                                                                                                   | 130 mg/m <sup>2</sup> | 1 |   |   |  |  |
|                                                                                                                                          | 165 mg/m <sup>2</sup> | 3 |   |   |  |  |
|                                                                                                                                          | 215 mg/m <sup>2</sup> | 2 | 1 |   |  |  |
|                                                                                                                                          | 280 mg/m <sup>2</sup> | 3 |   |   |  |  |
| Neck pain                                                                                                                                | 280 mg/m <sup>2</sup> | 1 |   |   |  |  |
| Non-cardiac chest pain                                                                                                                   | 165 mg/m <sup>2</sup> | 2 |   |   |  |  |
| Pain                                                                                                                                     | 280 mg/m <sup>2</sup> |   |   | 1 |  |  |
| Pain in extremity                                                                                                                        | 165 mg/m <sup>2</sup> | 1 |   |   |  |  |
|                                                                                                                                          | 215 mg/m <sup>2</sup> | 1 |   |   |  |  |
|                                                                                                                                          | 280 mg/m <sup>2</sup> |   | 2 |   |  |  |
| Penile pain                                                                                                                              | 215 mg/m <sup>2</sup> | 1 |   |   |  |  |
| Personality change                                                                                                                       | 215 mg/m <sup>2</sup> | 1 |   |   |  |  |
| Pharyngolaryngeal pain                                                                                                                   | 165 mg/m <sup>2</sup> | 1 |   |   |  |  |

|                                                                                                |                       |   |   |  |  |  |
|------------------------------------------------------------------------------------------------|-----------------------|---|---|--|--|--|
| Postnasal drip                                                                                 | 215 mg/m <sup>2</sup> | 1 |   |  |  |  |
| Pruritus                                                                                       | 215 mg/m <sup>2</sup> | 1 |   |  |  |  |
| Renal and urinary disorders - Other, specify                                                   | 280 mg/m <sup>2</sup> | 1 |   |  |  |  |
| Respiratory, thoracic and mediastinal disorders - Other, specify (upper respiratory infection) | 165 mg/m <sup>2</sup> | 1 |   |  |  |  |
| Respiratory, thoracic and mediastinal disorders - Other, specify (rhinorrhea)                  | 280 mg/m <sup>2</sup> | 1 |   |  |  |  |
| Scalp pain                                                                                     | 280 mg/m <sup>2</sup> | 1 |   |  |  |  |
| Sinus tachycardia                                                                              | 165 mg/m <sup>2</sup> | 1 |   |  |  |  |
| Skin and subcutaneous tissue disorders - Other, specify (Erythema from hangnails)              | 165 mg/m <sup>2</sup> |   | 1 |  |  |  |
| Skin ulceration                                                                                | 215 mg/m <sup>2</sup> | 1 |   |  |  |  |
| Sore throat                                                                                    | 215 mg/m <sup>2</sup> | 1 |   |  |  |  |
|                                                                                                | 280 mg/m <sup>2</sup> | 1 |   |  |  |  |
| Toothache                                                                                      | 280 mg/m <sup>2</sup> | 1 |   |  |  |  |
| Tremor                                                                                         | 280 mg/m <sup>2</sup> | 1 |   |  |  |  |
| Urinary tract pain                                                                             | 165 mg/m <sup>2</sup> | 1 |   |  |  |  |
| Vomiting                                                                                       | 165 mg/m <sup>2</sup> | 1 | 1 |  |  |  |
|                                                                                                | 215 mg/m <sup>2</sup> | 1 | 1 |  |  |  |
|                                                                                                | 280 mg/m <sup>2</sup> | 2 |   |  |  |  |
| Watering eyes                                                                                  | 165 mg/m <sup>2</sup> | 1 |   |  |  |  |
|                                                                                                | 215 mg/m <sup>2</sup> | 1 |   |  |  |  |
| Weight gain                                                                                    | 280 mg/m <sup>2</sup> | 1 |   |  |  |  |
| Weight loss                                                                                    | 165 mg/m <sup>2</sup> | 1 |   |  |  |  |
|                                                                                                | 280 mg/m <sup>2</sup> | 1 |   |  |  |  |

Maximum grade of Toxicities by Stratum, Irrespective of Attribution, Observed in patients in the 30-day period following completion of crizotinib (n=42 total).

| Toxicity Type     | Dose Level            | Maximum grade of patient-toxicity |         |         |         |         |
|-------------------|-----------------------|-----------------------------------|---------|---------|---------|---------|
|                   |                       | Grade 1                           | Grade 2 | Grade 3 | Grade 4 | Grade 5 |
| <b>Stratum A1</b> |                       | n=26                              |         |         |         |         |
| Anemia            | 100 mg/m <sup>2</sup> | 1                                 |         |         | 1       |         |
|                   | 130 mg/m <sup>2</sup> |                                   | 1       | 1       |         |         |
|                   | 165 mg/m <sup>2</sup> | 1                                 | 1       |         |         |         |
|                   | 215 mg/m <sup>2</sup> | 1                                 |         |         |         |         |
|                   | 280 mg/m <sup>2</sup> | 1                                 |         |         |         |         |
|                   | 365 mg/m <sup>2</sup> | 4                                 | 2       |         |         |         |



|                                                 |                       |   |   |   |   |  |
|-------------------------------------------------|-----------------------|---|---|---|---|--|
| Lymphocyte count decreased                      | 100 mg/m <sup>2</sup> |   |   | 1 | 1 |  |
|                                                 | 130 mg/m <sup>2</sup> |   | 2 | 2 |   |  |
|                                                 | 165 mg/m <sup>2</sup> |   | 1 |   |   |  |
|                                                 | 215 mg/m <sup>2</sup> | 1 |   | 1 |   |  |
|                                                 | 280 mg/m <sup>2</sup> |   | 1 |   |   |  |
|                                                 | 365 mg/m <sup>2</sup> |   | 1 |   |   |  |
| Neutrophil count decreased                      | 100 mg/m <sup>2</sup> |   |   |   | 2 |  |
|                                                 | 130 mg/m <sup>2</sup> |   | 1 |   | 1 |  |
|                                                 | 165 mg/m <sup>2</sup> |   | 1 |   |   |  |
|                                                 | 215 mg/m <sup>2</sup> |   |   | 1 |   |  |
|                                                 | 280 mg/m <sup>2</sup> |   |   | 1 |   |  |
|                                                 | 365 mg/m <sup>2</sup> |   |   | 1 | 1 |  |
| Platelet count decreased                        | 100 mg/m <sup>2</sup> |   |   |   | 2 |  |
|                                                 | 130 mg/m <sup>2</sup> |   |   |   | 1 |  |
|                                                 | 165 mg/m <sup>2</sup> | 1 |   |   |   |  |
| White blood cell decreased                      | 100 mg/m <sup>2</sup> |   |   |   | 1 |  |
|                                                 | 130 mg/m <sup>2</sup> |   |   | 1 | 1 |  |
|                                                 | 165 mg/m <sup>2</sup> | 2 |   |   |   |  |
|                                                 | 280 mg/m <sup>2</sup> | 2 |   |   |   |  |
|                                                 | 365 mg/m <sup>2</sup> | 2 |   |   |   |  |
| Abdominal pain                                  | 165 mg/m <sup>2</sup> | 1 |   |   |   |  |
| Acidosis                                        | 215 mg/m <sup>2</sup> | 1 |   |   |   |  |
| Activated partial thromboplastin time prolonged | 365 mg/m <sup>2</sup> | 1 |   |   |   |  |
| Agitation                                       | 130 mg/m <sup>2</sup> |   | 1 |   |   |  |
| Alanine aminotransferase increased              | 130 mg/m <sup>2</sup> | 1 |   |   |   |  |
|                                                 | 165 mg/m <sup>2</sup> | 1 |   |   |   |  |
|                                                 | 365 mg/m <sup>2</sup> |   | 1 |   |   |  |
| Alkaline phosphatase increased                  | 365 mg/m <sup>2</sup> | 1 |   |   |   |  |
| Alkalosis                                       | 215 mg/m <sup>2</sup> | 1 |   |   |   |  |
| Allergic rhinitis                               | 100 mg/m <sup>2</sup> | 2 |   |   |   |  |
|                                                 | 165 mg/m <sup>2</sup> | 1 |   |   |   |  |
| Alopecia                                        | 100 mg/m <sup>2</sup> |   | 1 |   |   |  |
| Amnesia                                         | 365 mg/m <sup>2</sup> | 1 |   |   |   |  |
| Anorexia                                        | 130 mg/m <sup>2</sup> |   | 1 | 1 |   |  |
|                                                 | 165 mg/m <sup>2</sup> |   | 1 |   |   |  |
|                                                 | 215 mg/m <sup>2</sup> | 1 |   |   |   |  |
|                                                 | 365 mg/m <sup>2</sup> | 1 |   |   |   |  |
| Anxiety                                         | 130 mg/m <sup>2</sup> |   | 1 |   |   |  |
|                                                 | 215 mg/m <sup>2</sup> | 1 |   |   |   |  |

|                                      |                       |   |   |   |   |        |
|--------------------------------------|-----------------------|---|---|---|---|--------|
|                                      | 365 mg/m <sup>2</sup> | 2 |   |   |   |        |
| Arthralgia                           | 165 mg/m <sup>2</sup> | 1 |   |   |   |        |
| Aspartate aminotransferase increased | 100 mg/m <sup>2</sup> | 1 |   |   |   |        |
|                                      | 215 mg/m <sup>2</sup> |   | 1 |   |   |        |
| Aspiration                           | 165 mg/m <sup>2</sup> |   |   |   | 1 |        |
| Back pain                            | 100 mg/m <sup>2</sup> | 1 |   |   |   |        |
|                                      | 165 mg/m <sup>2</sup> | 1 |   |   |   |        |
|                                      | 365 mg/m <sup>2</sup> |   | 1 |   |   |        |
| Bladder spasm                        | 130 mg/m <sup>2</sup> |   | 1 |   |   |        |
| Blurred vision                       | 365 mg/m <sup>2</sup> | 2 |   |   |   |        |
| Bronchopulmonary hemorrhage          | 130 mg/m <sup>2</sup> | 1 |   |   |   |        |
| Bruising                             | 365 mg/m <sup>2</sup> | 1 |   |   |   |        |
| Cerebrospinal fluid leakage          | 365 mg/m <sup>2</sup> | 1 |   |   |   |        |
| Cholesterol high                     | 100 mg/m <sup>2</sup> | 1 |   |   |   |        |
| Confusion                            | 130 mg/m <sup>2</sup> |   |   | 1 |   |        |
| Constipation                         | 130 mg/m <sup>2</sup> |   | 1 |   |   |        |
|                                      | 165 mg/m <sup>2</sup> |   | 1 |   |   |        |
|                                      | 365 mg/m <sup>2</sup> | 1 |   |   |   |        |
| Cough                                | 100 mg/m <sup>2</sup> | 1 |   |   |   |        |
|                                      | 130 mg/m <sup>2</sup> | 1 |   |   |   |        |
|                                      | 165 mg/m <sup>2</sup> | 1 |   |   |   |        |
|                                      | 215 mg/m <sup>2</sup> | 1 |   |   |   |        |
|                                      | 365 mg/m <sup>2</sup> | 1 |   |   |   |        |
| Creatinine increased                 | 165 mg/m <sup>2</sup> | 1 |   |   |   |        |
|                                      | 215 mg/m <sup>2</sup> | 1 |   |   |   |        |
|                                      | 365 mg/m <sup>2</sup> | 1 |   |   |   |        |
| Death NOS                            | 165 mg/m <sup>2</sup> |   |   |   |   | 1[MI3] |
|                                      | 215 mg/m <sup>2</sup> |   |   |   |   | 1[MI4] |
| Dehydration                          | 130 mg/m <sup>2</sup> |   | 1 | 1 |   |        |
|                                      | 165 mg/m <sup>2</sup> | 1 |   |   |   |        |
| Depressed level of consciousness     | 130 mg/m <sup>2</sup> |   | 1 |   |   |        |
| Depression                           | 130 mg/m <sup>2</sup> | 1 |   |   |   |        |
|                                      | 365 mg/m <sup>2</sup> | 1 |   |   |   |        |
| Diarrhea                             | 130 mg/m <sup>2</sup> | 1 |   |   |   |        |
| Dizziness                            | 165 mg/m <sup>2</sup> | 1 |   |   |   |        |
|                                      | 365 mg/m <sup>2</sup> | 1 |   |   |   |        |
| Dysphagia                            | 130 mg/m <sup>2</sup> |   | 1 |   |   |        |
|                                      | 165 mg/m <sup>2</sup> |   |   |   | 1 |        |
| Dyspnea                              | 215 mg/m <sup>2</sup> | 1 |   |   |   |        |
|                                      | 365 mg/m <sup>2</sup> |   | 1 |   |   |        |

|                            |                       |   |   |   |  |  |
|----------------------------|-----------------------|---|---|---|--|--|
| Edema face                 | 215 mg/m <sup>2</sup> | 1 |   |   |  |  |
|                            | 365 mg/m <sup>2</sup> | 1 |   |   |  |  |
| Epistaxis                  | 100 mg/m <sup>2</sup> | 1 |   |   |  |  |
|                            | 365 mg/m <sup>2</sup> | 1 |   |   |  |  |
| Extraocular muscle paresis | 130 mg/m <sup>2</sup> |   | 1 |   |  |  |
| Extrapyramidal disorder    | 130 mg/m <sup>2</sup> | 1 |   |   |  |  |
| Eye pain                   | 365 mg/m <sup>2</sup> | 1 |   |   |  |  |
| Fatigue                    | 130 mg/m <sup>2</sup> |   |   | 1 |  |  |
|                            | 165 mg/m <sup>2</sup> |   |   | 1 |  |  |
|                            | 365 mg/m <sup>2</sup> | 2 |   |   |  |  |
| Febrile neutropenia        | 100 mg/m <sup>2</sup> |   |   | 1 |  |  |
|                            | 130 mg/m <sup>2</sup> |   |   | 1 |  |  |
| Fever                      | 130 mg/m <sup>2</sup> | 1 |   |   |  |  |
|                            | 165 mg/m <sup>2</sup> | 2 |   |   |  |  |
| Flashing lights            | 130 mg/m <sup>2</sup> |   | 1 |   |  |  |
| Gait disturbance           | 100 mg/m <sup>2</sup> |   | 1 |   |  |  |
|                            | 130 mg/m <sup>2</sup> |   | 1 |   |  |  |
| GGT increased              | 165 mg/m <sup>2</sup> | 1 |   |   |  |  |
|                            | 365 mg/m <sup>2</sup> | 1 |   |   |  |  |
| Gum infection              | 130 mg/m <sup>2</sup> |   | 1 |   |  |  |
| Headache                   | 130 mg/m <sup>2</sup> |   |   | 1 |  |  |
| Hyperglycemia              | 100 mg/m <sup>2</sup> | 1 |   |   |  |  |
|                            | 165 mg/m <sup>2</sup> | 1 | 1 |   |  |  |
|                            | 215 mg/m <sup>2</sup> |   | 2 |   |  |  |
|                            | 280 mg/m <sup>2</sup> | 1 |   |   |  |  |
|                            | 365 mg/m <sup>2</sup> | 3 |   |   |  |  |
| Hyperhidrosis              | 365 mg/m <sup>2</sup> | 1 |   |   |  |  |
| Hypermagnesemia            | 165 mg/m <sup>2</sup> | 1 |   |   |  |  |
| Hypernatremia              | 215 mg/m <sup>2</sup> | 1 |   |   |  |  |
| Hypertriglyceridemia       | 100 mg/m <sup>2</sup> | 1 |   |   |  |  |
| Hypoalbuminemia            | 130 mg/m <sup>2</sup> | 1 |   |   |  |  |
|                            | 165 mg/m <sup>2</sup> | 1 |   |   |  |  |
|                            | 365 mg/m <sup>2</sup> |   | 1 |   |  |  |
| Hypocalcemia               | 130 mg/m <sup>2</sup> | 1 |   |   |  |  |
|                            | 215 mg/m <sup>2</sup> | 2 |   |   |  |  |
|                            | 365 mg/m <sup>2</sup> |   | 1 |   |  |  |
| Hypoglycemia               | 365 mg/m <sup>2</sup> | 1 |   |   |  |  |
| Hypokalemia                | 100 mg/m <sup>2</sup> | 1 |   |   |  |  |
|                            | 215 mg/m <sup>2</sup> | 1 |   |   |  |  |
|                            | 365 mg/m <sup>2</sup> | 3 |   |   |  |  |
| Hyponatremia               | 100 mg/m <sup>2</sup> | 1 |   |   |  |  |

|                                                                                                            |                       |   |   |   |   |        |
|------------------------------------------------------------------------------------------------------------|-----------------------|---|---|---|---|--------|
|                                                                                                            | 165 mg/m <sup>2</sup> | 1 |   |   |   |        |
| Hypophosphatemia                                                                                           | 165 mg/m <sup>2</sup> | 1 |   |   |   |        |
|                                                                                                            | 215 mg/m <sup>2</sup> | 2 |   |   |   |        |
|                                                                                                            | 280 mg/m <sup>2</sup> | 1 |   |   |   |        |
|                                                                                                            | 365 mg/m <sup>2</sup> | 2 |   |   |   |        |
| Hypotension                                                                                                | 215 mg/m <sup>2</sup> | 1 |   |   |   |        |
| Hypoxia                                                                                                    | 130 mg/m <sup>2</sup> |   | 1 |   |   |        |
|                                                                                                            | 365 mg/m <sup>2</sup> |   |   | 1 |   |        |
| Insomnia                                                                                                   | 130 mg/m <sup>2</sup> |   | 1 |   |   |        |
| Intracranial hemorrhage                                                                                    | 215 mg/m <sup>2</sup> |   |   |   |   | 1[M15] |
| Joint range of motion decreased                                                                            | 130 mg/m <sup>2</sup> | 1 |   |   |   |        |
|                                                                                                            | 280 mg/m <sup>2</sup> | 1 |   |   |   |        |
| Lethargy                                                                                                   | 365 mg/m <sup>2</sup> |   | 1 |   |   |        |
| Lipase increased                                                                                           | 365 mg/m <sup>2</sup> |   | 1 |   |   |        |
| Malaise                                                                                                    | 365 mg/m <sup>2</sup> | 1 |   |   |   |        |
| Memory impairment                                                                                          | 130 mg/m <sup>2</sup> | 1 |   |   |   |        |
| Muscle weakness lower limb                                                                                 | 100 mg/m <sup>2</sup> |   |   | 1 |   |        |
| Nausea                                                                                                     | 100 mg/m <sup>2</sup> | 1 |   |   |   |        |
|                                                                                                            | 215 mg/m <sup>2</sup> | 1 | 1 |   |   |        |
|                                                                                                            | 365 mg/m <sup>2</sup> | 2 |   |   |   |        |
| Neoplasms benign, malignant and unspecified (incl cysts and polyps) - Other, specify (Progressive disease) | 365 mg/m <sup>2</sup> |   |   |   |   | 1[M16] |
| Non-cardiac chest pain                                                                                     | 130 mg/m <sup>2</sup> |   | 1 |   |   |        |
|                                                                                                            | 215 mg/m <sup>2</sup> | 1 |   |   |   |        |
| Pain                                                                                                       | 365 mg/m <sup>2</sup> |   | 1 |   |   |        |
| Pain in extremity                                                                                          | 100 mg/m <sup>2</sup> |   |   | 1 |   |        |
|                                                                                                            | 280 mg/m <sup>2</sup> |   | 1 |   |   |        |
| Palpitations                                                                                               | 365 mg/m <sup>2</sup> | 1 |   |   |   |        |
| Paresthesia                                                                                                | 280 mg/m <sup>2</sup> | 1 |   |   |   |        |
| Peripheral motor neuropathy                                                                                | 100 mg/m <sup>2</sup> | 1 |   |   |   |        |
| Peripheral sensory neuropathy                                                                              | 365 mg/m <sup>2</sup> | 1 |   |   |   |        |
| Personality change                                                                                         | 165 mg/m <sup>2</sup> |   | 1 |   |   |        |
| Respiratory failure                                                                                        | 365 mg/m <sup>2</sup> |   |   |   | 1 |        |
| Respiratory, thoracic and mediastinal disorders - Other, specify (URI)                                     | 100 mg/m <sup>2</sup> | 1 |   |   |   |        |

|                                      |                       |            |   |   |   |  |
|--------------------------------------|-----------------------|------------|---|---|---|--|
| Seizure                              | 130 mg/m <sup>2</sup> |            | 2 |   |   |  |
| Sinus bradycardia                    | 165 mg/m <sup>2</sup> |            | 1 |   |   |  |
|                                      | 365 mg/m <sup>2</sup> | 1          |   |   |   |  |
| Sinus tachycardia                    | 365 mg/m <sup>2</sup> | 1          |   |   |   |  |
| Tremor                               | 130 mg/m <sup>2</sup> |            | 1 |   |   |  |
|                                      | 365 mg/m <sup>2</sup> | 1          |   |   |   |  |
| Tumor pain                           | 130 mg/m <sup>2</sup> |            |   | 2 |   |  |
| Urinary retention                    | 130 mg/m <sup>2</sup> |            | 1 |   |   |  |
|                                      | 365 mg/m <sup>2</sup> |            | 1 |   |   |  |
| Urinary tract pain                   | 165 mg/m <sup>2</sup> | 1          |   |   |   |  |
| Vomiting                             | 215 mg/m <sup>2</sup> | 1          |   |   |   |  |
|                                      | 365 mg/m <sup>2</sup> | 1          |   |   |   |  |
| Weight loss                          | 165 mg/m <sup>2</sup> | 1          |   |   |   |  |
|                                      | 215 mg/m <sup>2</sup> | 1          |   |   |   |  |
|                                      |                       |            |   |   |   |  |
| <b>Stratum A2</b>                    |                       | <b>n=8</b> |   |   |   |  |
| Anemia                               | 165 mg/m <sup>2</sup> | 1          | 1 | 1 |   |  |
|                                      | 280 mg/m <sup>2</sup> | 1          |   | 1 |   |  |
| Lymphocyte count decreased           | 165 mg/m <sup>2</sup> |            | 1 | 1 | 2 |  |
|                                      | 280 mg/m <sup>2</sup> |            | 1 | 1 |   |  |
| Neutrophil count decreased           | 165 mg/m <sup>2</sup> |            |   |   | 3 |  |
| Platelet count decreased             | 165 mg/m <sup>2</sup> | 1          |   |   | 3 |  |
|                                      | 280 mg/m <sup>2</sup> | 1          |   |   |   |  |
| White blood cell decreased           | 165 mg/m <sup>2</sup> |            |   |   | 3 |  |
|                                      | 280 mg/m <sup>2</sup> |            |   | 1 |   |  |
| Abdominal distension                 | 165 mg/m <sup>2</sup> |            | 1 |   |   |  |
| Abdominal pain                       | 165 mg/m <sup>2</sup> | 1          |   | 1 |   |  |
| Agitation                            | 165 mg/m <sup>2</sup> | 2          |   | 1 |   |  |
|                                      | 280 mg/m <sup>2</sup> | 1          |   |   |   |  |
| Alanine aminotransferase increased   | 165 mg/m <sup>2</sup> | 2          |   |   |   |  |
|                                      | 280 mg/m <sup>2</sup> | 1          |   |   |   |  |
| Alkaline phosphatase increased       | 165 mg/m <sup>2</sup> | 1          |   |   |   |  |
| Alopecia                             | 165 mg/m <sup>2</sup> | 1          |   |   |   |  |
| Anorexia                             | 165 mg/m <sup>2</sup> |            |   | 2 |   |  |
| Anxiety                              | 165 mg/m <sup>2</sup> |            | 1 |   |   |  |
| Arthralgia                           | 165 mg/m <sup>2</sup> | 1          |   |   |   |  |
| Aspartate aminotransferase increased | 165 mg/m <sup>2</sup> |            | 1 |   |   |  |
|                                      | 280 mg/m <sup>2</sup> | 1          |   |   |   |  |
| Back pain                            | 280 mg/m <sup>2</sup> | 1          |   |   |   |  |

|                                                                                   |                       |   |   |   |  |        |
|-----------------------------------------------------------------------------------|-----------------------|---|---|---|--|--------|
| Blood antidiuretic hormone abnormal                                               | 165 mg/m <sup>2</sup> | 1 |   |   |  |        |
| Blood bilirubin increased                                                         | 165 mg/m <sup>2</sup> |   |   | 1 |  |        |
| Bruising                                                                          | 165 mg/m <sup>2</sup> | 1 |   |   |  |        |
| Chills                                                                            | 165 mg/m <sup>2</sup> | 1 |   |   |  |        |
| Colonic obstruction                                                               | 165 mg/m <sup>2</sup> |   |   | 1 |  |        |
| Colonic stenosis                                                                  | 165 mg/m <sup>2</sup> |   |   | 1 |  |        |
| Constipation                                                                      | 165 mg/m <sup>2</sup> | 1 |   |   |  |        |
| Cough                                                                             | 280 mg/m <sup>2</sup> | 1 |   |   |  |        |
| Creatinine increased                                                              | 280 mg/m <sup>2</sup> | 1 |   |   |  |        |
| Cushingoid                                                                        | 165 mg/m <sup>2</sup> | 1 |   |   |  |        |
| Cystitis noninfective                                                             | 165 mg/m <sup>2</sup> | 1 |   |   |  |        |
| Dehydration                                                                       | 165 mg/m <sup>2</sup> |   |   | 1 |  |        |
|                                                                                   | 280 mg/m <sup>2</sup> | 1 |   |   |  |        |
| Diarrhea                                                                          | 165 mg/m <sup>2</sup> | 1 | 1 |   |  |        |
| Dizziness                                                                         | 165 mg/m <sup>2</sup> |   | 1 |   |  |        |
| Dry skin                                                                          | 165 mg/m <sup>2</sup> | 1 |   |   |  |        |
| Dyspnea                                                                           | 165 mg/m <sup>2</sup> | 1 |   |   |  |        |
| Edema limbs                                                                       | 280 mg/m <sup>2</sup> |   |   | 1 |  |        |
| Electrocardiogram QT corrected interval prolonged                                 | 165 mg/m <sup>2</sup> |   |   | 1 |  |        |
| Epistaxis                                                                         | 165 mg/m <sup>2</sup> | 1 |   |   |  |        |
| Esophageal pain                                                                   | 165 mg/m <sup>2</sup> |   |   | 1 |  |        |
| Esophagitis                                                                       | 165 mg/m <sup>2</sup> |   |   | 1 |  |        |
| Fall                                                                              | 280 mg/m <sup>2</sup> | 1 |   |   |  |        |
| Fatigue                                                                           | 165 mg/m <sup>2</sup> | 1 |   |   |  |        |
|                                                                                   | 280 mg/m <sup>2</sup> | 1 |   |   |  |        |
| Febrile neutropenia                                                               | 165 mg/m <sup>2</sup> |   |   | 1 |  |        |
| Flatulence                                                                        | 165 mg/m <sup>2</sup> | 1 |   |   |  |        |
| General disorders and administration site conditions - Other, specify (Death NOS) | 280 mg/m <sup>2</sup> |   |   |   |  | 1[M17] |
| Headache                                                                          | 165 mg/m <sup>2</sup> |   | 1 | 1 |  |        |
| Hematoma                                                                          | 165 mg/m <sup>2</sup> |   | 1 |   |  |        |
| Hypercalcemia                                                                     | 165 mg/m <sup>2</sup> | 1 |   |   |  |        |
| Hyperglycemia                                                                     | 165 mg/m <sup>2</sup> |   |   | 1 |  |        |
|                                                                                   | 280 mg/m <sup>2</sup> | 2 |   |   |  |        |
| Hyperhidrosis                                                                     | 165 mg/m <sup>2</sup> | 1 |   |   |  |        |
| Hypermagnesemia                                                                   | 165 mg/m <sup>2</sup> | 1 |   |   |  |        |
|                                                                                   | 280 mg/m <sup>2</sup> | 2 |   |   |  |        |

|                                                                                            |                       |   |   |   |   |  |
|--------------------------------------------------------------------------------------------|-----------------------|---|---|---|---|--|
| Hypertension                                                                               | 165 mg/m <sup>2</sup> |   | 1 |   | 1 |  |
| Hypertriglyceridemia                                                                       | 165 mg/m <sup>2</sup> | 1 |   |   |   |  |
| Hypoalbuminemia                                                                            | 165 mg/m <sup>2</sup> | 3 | 1 |   |   |  |
|                                                                                            | 280 mg/m <sup>2</sup> |   | 2 |   |   |  |
| Hypocalcemia                                                                               | 165 mg/m <sup>2</sup> | 1 | 1 |   |   |  |
|                                                                                            | 280 mg/m <sup>2</sup> | 2 |   |   |   |  |
| Hypoglycemia                                                                               | 280 mg/m <sup>2</sup> | 1 |   |   |   |  |
| Hypokalemia                                                                                | 165 mg/m <sup>2</sup> | 1 |   | 1 |   |  |
|                                                                                            | 280 mg/m <sup>2</sup> | 1 |   |   |   |  |
| Hypomagnesemia                                                                             | 165 mg/m <sup>2</sup> | 2 | 1 |   |   |  |
| Hyponatremia                                                                               | 165 mg/m <sup>2</sup> |   |   | 1 |   |  |
|                                                                                            | 280 mg/m <sup>2</sup> | 1 |   |   |   |  |
| Hypophosphatemia                                                                           | 165 mg/m <sup>2</sup> | 1 |   | 1 |   |  |
|                                                                                            | 280 mg/m <sup>2</sup> | 1 |   |   |   |  |
| Infections Other, specify (documented clinically or microbiologically with ANC<1.0x10e9/L) | 165 mg/m <sup>2</sup> |   |   | 1 |   |  |
| Infections and infestations - Other, specify (Adenovirus in blood)                         | 165 mg/m <sup>2</sup> |   |   | 1 |   |  |
| Infusion related reaction                                                                  | 165 mg/m <sup>2</sup> |   | 1 |   |   |  |
| INR increased                                                                              | 165 mg/m <sup>2</sup> |   | 1 |   |   |  |
| Irritability                                                                               | 165 mg/m <sup>2</sup> | 1 |   |   |   |  |
| Mucositis oral                                                                             | 165 mg/m <sup>2</sup> |   |   | 2 |   |  |
| Nausea                                                                                     | 165 mg/m <sup>2</sup> |   | 1 |   |   |  |
| Non-cardiac chest pain                                                                     | 280 mg/m <sup>2</sup> |   | 1 |   |   |  |
| Pain                                                                                       | 280 mg/m <sup>2</sup> | 1 |   |   |   |  |
| Pain in extremity                                                                          | 165 mg/m <sup>2</sup> | 1 |   |   |   |  |
|                                                                                            | 280 mg/m <sup>2</sup> | 1 |   |   |   |  |
| Pain of skin                                                                               | 165 mg/m <sup>2</sup> | 1 |   |   |   |  |
| Penile pain                                                                                | 165 mg/m <sup>2</sup> | 1 |   |   |   |  |
| Pruritus                                                                                   | 165 mg/m <sup>2</sup> | 1 | 1 |   |   |  |
| Rash maculo-papular                                                                        | 165 mg/m <sup>2</sup> | 2 |   | 1 |   |  |
| Seizure                                                                                    | 165 mg/m <sup>2</sup> |   |   | 1 |   |  |
| Sinus tachycardia                                                                          | 165 mg/m <sup>2</sup> | 2 |   |   |   |  |
|                                                                                            | 280 mg/m <sup>2</sup> | 1 |   |   |   |  |
| Skin infection                                                                             | 165 mg/m <sup>2</sup> |   |   | 1 |   |  |
| Urinary incontinence                                                                       | 165 mg/m <sup>2</sup> | 1 |   |   |   |  |
| Vomiting                                                                                   | 165 mg/m <sup>2</sup> | 2 | 1 | 1 |   |  |

| <b>Stratum A3</b>                        |                       | <b>n=8</b> |   |   |  |  |
|------------------------------------------|-----------------------|------------|---|---|--|--|
| Anemia                                   | 165 mg/m <sup>2</sup> | 1          |   |   |  |  |
|                                          | 215 mg/m <sup>2</sup> | 1          |   | 1 |  |  |
| Lymphocyte count decreased               | 165 mg/m <sup>2</sup> |            | 1 |   |  |  |
|                                          | 215 mg/m <sup>2</sup> |            | 1 |   |  |  |
| Neutrophil count decreased               | 165 mg/m <sup>2</sup> |            | 1 |   |  |  |
| Platelet count decreased                 | 215 mg/m <sup>2</sup> |            |   | 1 |  |  |
| White blood cell decreased               | 165 mg/m <sup>2</sup> | 1          |   |   |  |  |
|                                          | 215 mg/m <sup>2</sup> |            |   | 1 |  |  |
| Alanine aminotransferase increased       | 215 mg/m <sup>2</sup> | 1          |   |   |  |  |
| Anorexia                                 | 165 mg/m <sup>2</sup> |            | 1 |   |  |  |
| Anxiety                                  | 280 mg/m <sup>2</sup> | 1          |   |   |  |  |
| Ataxia                                   | 280 mg/m <sup>2</sup> | 1          |   |   |  |  |
| Back pain                                | 280 mg/m <sup>2</sup> |            |   | 1 |  |  |
| Bone pain                                | 280 mg/m <sup>2</sup> |            |   | 1 |  |  |
| Chest pain - cardiac                     | 280 mg/m <sup>2</sup> |            |   | 1 |  |  |
| Constipation                             | 215 mg/m <sup>2</sup> | 1          |   |   |  |  |
| Cough                                    | 280 mg/m <sup>2</sup> | 1          |   |   |  |  |
| Edema limbs                              | 280 mg/m <sup>2</sup> | 1          |   |   |  |  |
| Headache                                 | 215 mg/m <sup>2</sup> | 1          |   |   |  |  |
|                                          | 280 mg/m <sup>2</sup> |            |   | 1 |  |  |
| Hyperglycemia                            | 165 mg/m <sup>2</sup> | 1          |   |   |  |  |
|                                          | 280 mg/m <sup>2</sup> |            | 1 |   |  |  |
| Hypoalbuminemia                          | 280 mg/m <sup>2</sup> | 1          |   |   |  |  |
| Hypocalcemia                             | 215 mg/m <sup>2</sup> | 1          |   |   |  |  |
| Hypoglycemia                             | 280 mg/m <sup>2</sup> | 1          |   |   |  |  |
| Hypokalemia                              | 165 mg/m <sup>2</sup> | 1          |   |   |  |  |
|                                          | 215 mg/m <sup>2</sup> | 1          |   |   |  |  |
| Hyponatremia                             | 165 mg/m <sup>2</sup> | 1          |   |   |  |  |
| Hypophosphatemia                         | 215 mg/m <sup>2</sup> | 1          |   |   |  |  |
| Nausea                                   | 215 mg/m <sup>2</sup> | 1          |   |   |  |  |
| Rash maculo-papular                      | 165 mg/m <sup>2</sup> | 1          |   |   |  |  |
| Respiratory Other, specify (Sore Throat) | 215 mg/m <sup>2</sup> | 1          |   |   |  |  |
| Urinary incontinence                     | 130 mg/m <sup>2</sup> | 1          |   |   |  |  |
| Vomiting                                 | 215 mg/m <sup>2</sup> | 1          |   |   |  |  |
|                                          | 280 mg/m <sup>2</sup> | 1          |   |   |  |  |



**Supplemental Table 2.** Crizotinib dose reductions due to toxicity.

| Accession No. | Dose Level<br>mg/m <sup>2</sup> /dose<br>BID | Part | Patient<br>diagnosis        | Age<br>(years) | Total<br>number of<br>cycles<br>received | Cycle(s) at<br>which dose<br>reduction<br>occurred | Adverse Event(s) leading to dose<br>reduction (Grade)       |
|---------------|----------------------------------------------|------|-----------------------------|----------------|------------------------------------------|----------------------------------------------------|-------------------------------------------------------------|
| 13            | 165                                          | A1   | Neuroblastoma               | 8              | >39*                                     | 2                                                  | Diarrhea (G3)                                               |
| 31            | 215                                          | A1   | Hepatocellular<br>carcinoma | 17             | 3                                        | 1                                                  | Dizziness (G3)                                              |
| 48            | 280                                          | A1   | IMT                         | 1              | >19*                                     | 8                                                  | Diarrhea (G3), Skin infection (G2)                          |
| 56            | 365                                          | A1   | Neuroblastoma               | 2              | 8                                        | 7                                                  | Neutrophil count decreased (G4)                             |
| 71            | 365                                          | A1   | Osteosarcoma                | 11             | 2                                        | 1                                                  | Neutrophil count decreased (G4)                             |
| 30            | 165                                          | A2   | NSCLC <sup>^</sup>          | 17             | 5                                        | 1                                                  | Neutrophil count decreased (G4)                             |
| 37            | 165                                          | A2   | ALCL <sup>#</sup>           | 13             | >30*                                     | 19                                                 | Eye disorders, other - Blue discoloration<br>to vision (G2) |
| 73            | 280                                          | A2   | IMT <sup>@</sup>            | 10             | 5                                        | 2                                                  | Neutrophil count decreased (G4)                             |

\*Patient still on protocol therapy; <sup>^</sup>NSCLC = non-small cell lung cancer; <sup>#</sup>ALCL = anaplastic large cell lymphoma; <sup>@</sup>IMT= inflammatory myofibroblastic tumor

**Supplemental Table 3. AdEERs-reported Adverse Events**

| Accession No | Part | Dose Level (mg/m <sup>2</sup> /dose) | Cycle     | Adverse Event               | Grade | Attribution | DLT |
|--------------|------|--------------------------------------|-----------|-----------------------------|-------|-------------|-----|
| 1            | A1   | 100                                  | 1         | Febrile neutropenia         | 3     | UNLIKELY    | NO  |
|              |      |                                      |           | Neutrophil count decreased  | 4     | UNLIKELY    | NO  |
| 3            | A1   | 100                                  | Follow-up | Lymphocyte count decreased  | 3     | UNRELATED   | NO  |
|              |      |                                      |           | Febrile neutropenia         | 3     | UNRELATED   | NO  |
|              |      |                                      |           | Pain in extremity           | 3     | UNLIKELY    | NO  |
|              |      |                                      |           | Neutrophil count decreased  | 4     | UNRELATED   | NO  |
|              |      |                                      |           | Platelet count decreased    | 4     | UNRELATED   | NO  |
| 5            | A1   | 130                                  | 1         | Bronchospasm                | 3     | UNLIKELY    | NO  |
|              |      |                                      | Follow-up | Tumor pain                  | 3     | UNRELATED   | NO  |
| 6            | A1   | 130                                  | 2         | Abdominal distension        | 2     | POSSIBLE    | NO  |
|              |      |                                      |           | Ileus                       | 2     | POSSIBLE    | NO  |
|              |      |                                      |           | Abdominal pain              | 2     | POSSIBLE    | NO  |
|              |      |                                      |           | Vomiting                    | 3     | POSSIBLE    | NO  |
|              |      |                                      | 4         | Neutrophil count decreased  | 4     | POSSIBLE    | YES |
|              |      |                                      | Follow-up | Gait disturbance            | 2     | UNLIKELY    | NO  |
|              |      |                                      |           | Confusion                   | 3     | UNRELATED   | NO  |
|              |      |                                      |           | Tumor pain                  | 3     | UNRELATED   | NO  |
|              |      |                                      |           | Anorexia                    | 3     | UNLIKELY    | NO  |
|              |      |                                      |           | Dehydration                 | 3     | UNLIKELY    | NO  |
|              |      |                                      |           | Fatigue                     | 3     | UNLIKELY    | NO  |
| Headache     | 3    | UNLIKELY                             |           | NO                          |       |             |     |
| Anemia       | 3    | POSSIBLE                             | NO        |                             |       |             |     |
| 10           | A1   | 130                                  | 2         | GGT increased               | 2     | POSSIBLE    | NO  |
|              |      |                                      |           | Intracranial hemorrhage     | 4     | UNLIKELY    | NO  |
| 11           | A2   | 100                                  | 1         | Hyperglycemia               | 2     | POSSIBLE    | NO  |
|              |      |                                      | 4         | Hypokalemia                 | 4     | UNRELATED   | NO  |
| 15           | A1   | 165                                  | 2         | Hypoxia                     | 3     | UNLIKELY    | NO  |
|              |      |                                      |           | Peripheral motor neuropathy | 3     | UNLIKELY    | NO  |
|              |      |                                      |           | Dyspnea                     | 4     | UNLIKELY    | NO  |
|              |      |                                      | Folow-up  | Fatigue                     | 3     | UNRELATED   | NO  |
|              |      |                                      |           | Aspiration                  | 4     | UNRELATED   | NO  |
|              |      |                                      |           | Dysphagia                   | 4     | UNRELATED   | NO  |
|              |      |                                      |           | Death NOS                   | 5     | UNRELATED   | NO  |
| 16           | A1   | 165                                  | 1         | Neutrophil count decreased  | 2     | POSSIBLE    | NO  |
|              |      |                                      |           | Pain in extremity           | 3     | UNRELATED   | NO  |
| 18           | A1   | 165                                  | 1         | Neutrophil count decreased  | 2     | POSSIBLE    | NO  |
|              |      |                                      | 3         | White blood cell decreased  | 2     | POSSIBLE    | NO  |

|                            |    |           |           |                                                                                                                                                    |   |           |     |
|----------------------------|----|-----------|-----------|----------------------------------------------------------------------------------------------------------------------------------------------------|---|-----------|-----|
|                            |    |           |           | Neutrophil count decreased                                                                                                                         | 3 | POSSIBLE  | NO  |
| 22                         | A1 | 165       | 3         | White blood cell decreased                                                                                                                         | 2 | POSSIBLE  | NO  |
|                            |    |           |           | Neutrophil count decreased                                                                                                                         | 3 | POSSIBLE  | NO  |
|                            |    |           | 4         | Neutrophil count decreased                                                                                                                         | 2 | POSSIBLE  | NO  |
|                            |    |           | 5         | Neutrophil count decreased                                                                                                                         | 2 | POSSIBLE  | NO  |
| 23                         | A2 | 165       | 1         | GGT increased                                                                                                                                      | 3 | UNLIKELY  | NO  |
|                            |    |           | 3         | Constipation                                                                                                                                       | 3 | UNLIKELY  | NO  |
|                            |    |           | Follow-up | Anorexia                                                                                                                                           | 3 | UNRELATED | NO  |
|                            |    |           |           | Colonic obstruction                                                                                                                                | 3 | UNRELATED | NO  |
|                            |    |           |           | Colonic stenosis                                                                                                                                   | 3 | UNRELATED | NO  |
|                            |    |           |           | Esophageal pain                                                                                                                                    | 3 | UNRELATED | NO  |
|                            |    |           |           | Esophagitis                                                                                                                                        | 3 | UNRELATED | NO  |
|                            |    |           |           | Febrile neutropenia                                                                                                                                | 3 | UNRELATED | NO  |
|                            |    |           |           | Hyponatremia                                                                                                                                       | 3 | UNRELATED | NO  |
|                            |    |           |           | Hypophosphatemia                                                                                                                                   | 3 | UNRELATED | NO  |
|                            |    |           |           | Infections and infestations - Other, specify (documented clinically or microbiologically with Grade 3 or 4 neutrophils with ANC<1.0x10e9/L: Blood) | 3 | UNRELATED | NO  |
|                            |    |           |           | Blood bilirubin increased                                                                                                                          | 3 | UNLIKELY  | NO  |
|                            |    |           |           | Hyperglycemia                                                                                                                                      | 3 | UNLIKELY  | NO  |
|                            |    |           |           | Hypokalemia                                                                                                                                        | 3 | UNLIKELY  | NO  |
|                            |    |           |           | Seizure                                                                                                                                            | 3 | UNLIKELY  | NO  |
| Neutrophil count decreased | 4  | UNRELATED | NO        |                                                                                                                                                    |   |           |     |
| Hypertension               | 4  | UNLIKELY  | NO        |                                                                                                                                                    |   |           |     |
| 24                         | A2 | 165       | 1         | Abdominal distension                                                                                                                               | 3 | UNLIKELY  | NO  |
|                            |    |           |           | Creatinine increased                                                                                                                               | 3 | UNLIKELY  | NO  |
|                            |    |           |           | Hypokalemia                                                                                                                                        | 3 | UNLIKELY  | NO  |
|                            |    |           |           | Hypoxia                                                                                                                                            | 3 | UNLIKELY  | NO  |
| 25                         | A1 | 215       | 2         | Neutrophil count decreased                                                                                                                         | 3 | POSSIBLE  | NO  |
| 28                         | A1 | 215       | 1         | Vomiting                                                                                                                                           | 3 | UNLIKELY  | NO  |
|                            |    |           | Follow-up | Death NOS                                                                                                                                          | 5 | UNRELATED | NO  |
| 30                         | A2 | 165       | 1         | Neutrophil count decreased                                                                                                                         | 4 | POSSIBLE  | YES |
|                            |    |           | Follow-up | Anorexia                                                                                                                                           | 3 | UNLIKELY  | NO  |
|                            |    |           |           | Dehydration                                                                                                                                        | 3 | UNLIKELY  | NO  |
|                            |    |           |           | Headache                                                                                                                                           | 3 | UNLIKELY  | NO  |
|                            |    |           |           | Vomiting                                                                                                                                           | 3 | UNLIKELY  | NO  |
| 31                         | A1 | 215       | 1         | Peripheral sensory neuropathy                                                                                                                      | 2 | PROBABLE  | NO  |
|                            |    |           |           | Tinnitus                                                                                                                                           | 2 | PROBABLE  | NO  |
|                            |    |           |           | White blood cell decreased                                                                                                                         | 2 | PROBABLE  | NO  |
|                            |    |           |           | Dizziness                                                                                                                                          | 3 | PROBABLE  | YES |

|                                                                       |                                                                 |          |           |                                                                                                                              |   |           |     |
|-----------------------------------------------------------------------|-----------------------------------------------------------------|----------|-----------|------------------------------------------------------------------------------------------------------------------------------|---|-----------|-----|
|                                                                       |                                                                 |          |           | Neutrophil count decreased                                                                                                   | 3 | PROBABLE  | NO  |
| 32                                                                    | A3                                                              | 165      | 3         | Catheter related infection                                                                                                   | 3 | UNLIKELY  | NO  |
| 33                                                                    | A1                                                              | 215      | Follow-up | Intracranial hemorrhage                                                                                                      | 5 | POSSIBLE  | YES |
| 34                                                                    | A1                                                              | 215      | 2         | Neutrophil count decreased                                                                                                   | 2 | POSSIBLE  | NO  |
|                                                                       |                                                                 |          | 3         | Nail loss                                                                                                                    | 1 | POSSIBLE  | NO  |
|                                                                       |                                                                 |          |           | Vomiting                                                                                                                     | 1 | POSSIBLE  | NO  |
|                                                                       |                                                                 |          |           | Pain                                                                                                                         | 2 | POSSIBLE  | NO  |
|                                                                       |                                                                 |          |           | Pain                                                                                                                         | 2 | POSSIBLE  | NO  |
|                                                                       |                                                                 |          |           | Skin infection                                                                                                               | 3 | UNLIKELY  | NO  |
|                                                                       |                                                                 |          |           | Neutrophil count decreased                                                                                                   | 3 | POSSIBLE  | NO  |
|                                                                       |                                                                 |          | 4         | Headache                                                                                                                     | 2 | POSSIBLE  | NO  |
| Neutrophil count decreased                                            | 3                                                               | POSSIBLE |           | NO                                                                                                                           |   |           |     |
| 5                                                                     | Neutrophil count decreased                                      | 2        | POSSIBLE  | NO                                                                                                                           |   |           |     |
| 35                                                                    | A3                                                              | 165      | 1         | Hypoalbuminemia                                                                                                              | 2 | POSSIBLE  | NO  |
|                                                                       |                                                                 |          |           | Bone pain                                                                                                                    | 3 | UNRELATED | NO  |
|                                                                       |                                                                 |          | 2         | Hypotension                                                                                                                  | 2 | UNRELATED | NO  |
|                                                                       |                                                                 |          |           | Anemia                                                                                                                       | 3 | UNLIKELY  | NO  |
|                                                                       |                                                                 |          |           | Fever                                                                                                                        | 3 | UNLIKELY  | NO  |
| Infections and infestations - Other, specify (with normal ANC: Blood) | 3                                                               | POSSIBLE | NO        |                                                                                                                              |   |           |     |
| 36                                                                    | A2                                                              | 165      | Follow-up | Skin infection                                                                                                               | 3 | UNRELATED | NO  |
| 37                                                                    | A2                                                              | 165      | 1         | Neutrophil count decreased                                                                                                   | 2 | PROBABLE  | NO  |
|                                                                       |                                                                 |          | 4         | Neutrophil count decreased                                                                                                   | 2 | PROBABLE  | NO  |
|                                                                       |                                                                 |          | 5         | Neutrophil count decreased                                                                                                   | 2 | PROBABLE  | NO  |
|                                                                       |                                                                 |          | 6         | Neutrophil count decreased                                                                                                   | 2 | PROBABLE  | NO  |
|                                                                       |                                                                 |          | 7         | Neutrophil count decreased                                                                                                   | 2 | PROBABLE  | NO  |
|                                                                       |                                                                 |          | 8         | Neutrophil count decreased                                                                                                   | 2 | POSSIBLE  | NO  |
|                                                                       |                                                                 |          | 19        | Eye disorders - Other, specify (Blue discoloration to vision)                                                                | 2 | PROBABLE  | YES |
| 39                                                                    | A2                                                              | 165      | 3         | Neutrophil count decreased                                                                                                   | 2 | PROBABLE  | NO  |
|                                                                       |                                                                 |          | 5         | Neutrophil count decreased                                                                                                   | 3 | POSSIBLE  | NO  |
|                                                                       |                                                                 |          | 6         | Catheter related infection                                                                                                   | 3 | UNRELATED | NO  |
|                                                                       |                                                                 |          |           | Neutrophil count decreased                                                                                                   | 3 | UNLIKELY  | NO  |
| 9                                                                     | Renal and urinary disorders - Other, specify (enlarged kidneys) | 2        | POSSIBLE  | NO                                                                                                                           |   |           |     |
| 40                                                                    | A2                                                              | 165      | 1         | Infections and infestations - Other, specify (Infection with Grade 3 or 4 neutrophils (ANC <1.0 x 10e9/L): Catheter-related) | 3 | UNLIKELY  | NO  |
|                                                                       |                                                                 |          | 3         | Fever                                                                                                                        | 3 | UNLIKELY  | NO  |
|                                                                       |                                                                 |          | 5         | Infections and infestations - Other, specify (Infection with Grade 3 or 4 neutrophils (ANC <1.0 x 10e9/L): Catheter-related) | 3 | UNLIKELY  | NO  |
|                                                                       |                                                                 |          |           | Neutrophil count decreased                                                                                                   | 4 | UNLIKELY  | NO  |

|    |    |     |           |                                                                                                            |   |           |     |
|----|----|-----|-----------|------------------------------------------------------------------------------------------------------------|---|-----------|-----|
|    |    |     | 16        | Infections and infestations - Other, specify (Disseminated Varicella Zoster)                               | 3 | UNRELATED | NO  |
|    |    |     |           | Febrile neutropenia                                                                                        | 3 | POSSIBLE  | NO  |
| 42 | A2 | 165 | 2         | Hypoalbuminemia                                                                                            | 2 | POSSIBLE  | NO  |
| 44 | A1 | 215 | 6         | Infections and infestations - Other, specify (Chest wall bacterial cellulitis)                             | 3 | UNRELATED | NO  |
|    |    |     | 9         | Infections and infestations - Other, specify (Chest wall abscess requiring drainage.)                      | 3 | UNLIKELY  | NO  |
| 48 | A1 | 280 | 8         | Skin infection                                                                                             | 2 | PROBABLE  | YES |
| 50 | A1 | 280 | 1         | Nervous system disorders - Other, specify (presyncope)                                                     | 2 | POSSIBLE  | NO  |
| 51 | A2 | 215 | 6         | Flatulence                                                                                                 | 2 | POSSIBLE  | NO  |
| 62 | A2 | 280 | 2         | Infections and infestations - Other, specify (Viral gastroenteritis)                                       | 3 | UNLIKELY  | NO  |
| 64 | A1 | 365 | 1         | Alanine aminotransferase increased                                                                         | 4 | PROBABLE  | YES |
|    |    |     |           | Aspartate aminotransferase increased                                                                       | 4 | PROBABLE  | YES |
|    |    |     |           | GGT increased                                                                                              | 4 | PROBABLE  | YES |
| 67 | A1 | 365 | Follow-up | Neoplasms benign, malignant and unspecified (incl cysts and polyps) - Other, specify (Progressive disease) | 5 | UNLIKELY  | NO  |
| 70 | A1 | 365 | Follow-up | Respiratory failure                                                                                        | 4 | UNRELATED | NO  |
| 71 | A1 | 365 | 1         | Pain                                                                                                       | 3 | UNRELATED | NO  |
|    |    |     |           | Myositis                                                                                                   | 3 | UNLIKELY  | NO  |
| 72 | A1 | 365 | 2         | Personality change                                                                                         | 2 | POSSIBLE  | NO  |
| 76 | A2 | 280 | Follow-up | General disorders and administration site conditions - Other, specify (Death NOS)                          | 5 | UNRELATED | NO  |
| 79 | A2 | 280 | 2         | Anemia                                                                                                     | 3 | UNLIKELY  | NO  |
|    |    |     | 2         | Epistaxis                                                                                                  | 3 | UNLIKELY  | NO  |
|    |    |     | 2         | Platelet count decreased                                                                                   | 4 | UNLIKELY  | NO  |
|    |    |     | 3         | Death NOS                                                                                                  | 5 | UNRELATED | NO  |

Figure

A.

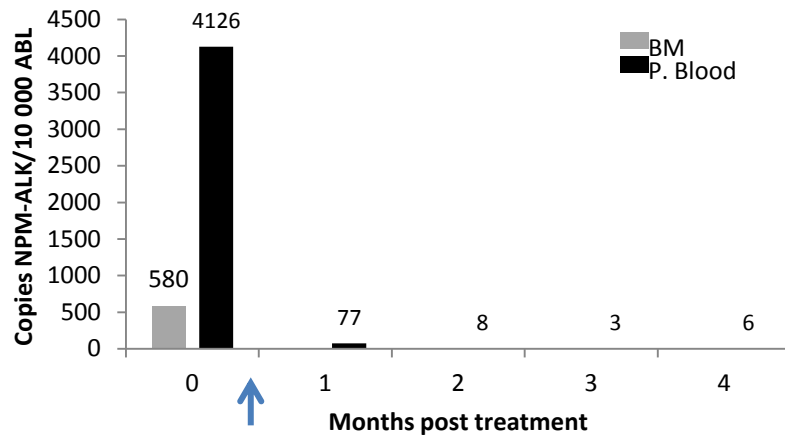

B.

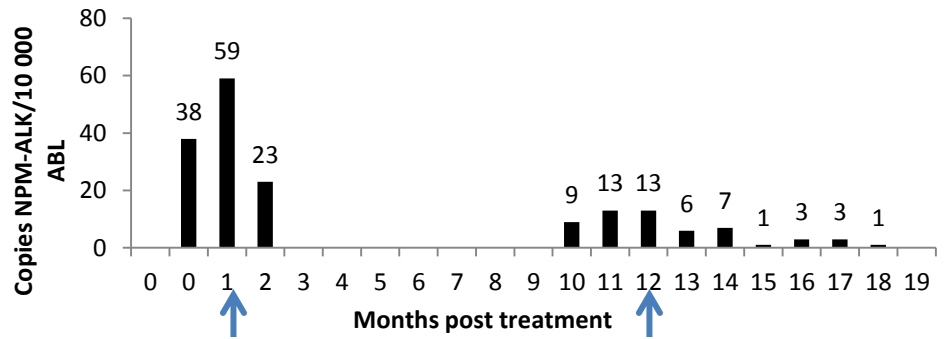

C.

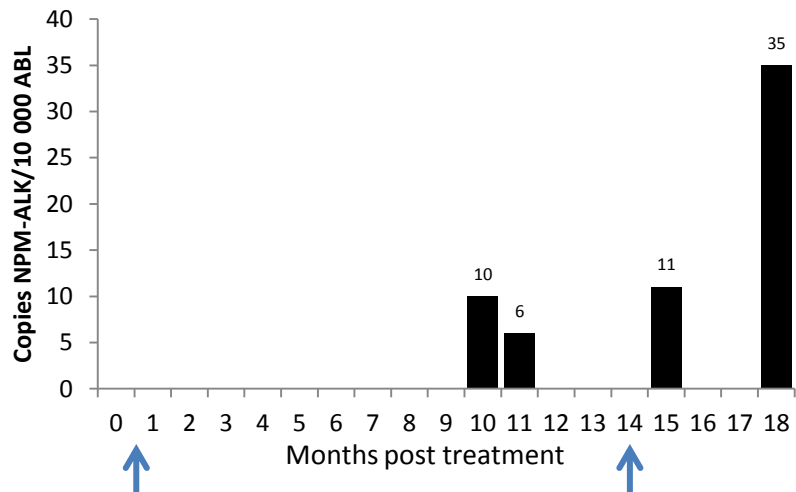

D.

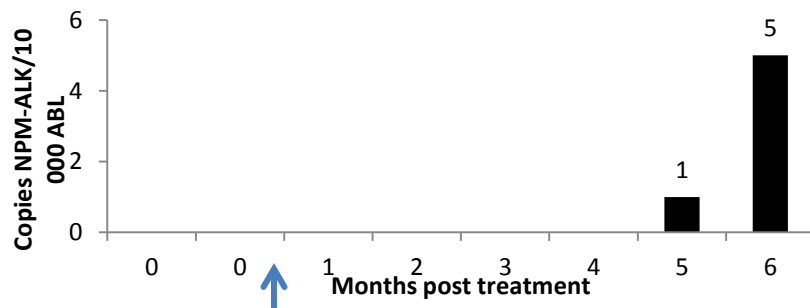

Crizotinib Dose assignment: 280 mg/m<sup>2</sup>/dose (RP2D)

| BSA (m <sup>2</sup> ) | Crizotinib<br>(mg/day) | Crizotinib<br>(mg PO BID) |         |
|-----------------------|------------------------|---------------------------|---------|
|                       | Total Daily<br>Dose    | mg q am                   | mg q hs |
| 0.30-0.33             | 180                    | 90                        | 90      |
| 0.34-0.37             | 200                    | 100                       | 100     |
| 0.38-0.41             | 220                    | 110                       | 110     |
| 0.42-0.45             | 240                    | 120                       | 120     |
| 0.46-0.48             | 260                    | 130                       | 130     |
| 0.49-0.51             | 280                    | 140                       | 140     |
| 0.52-0.55             | 300                    | 150                       | 150     |
| 0.56-0.58             | 320                    | 160                       | 160     |
| 0.59-0.62             | 340                    | 170                       | 170     |
| 0.63-0.66             | 360                    | 180                       | 180     |
| 0.67-0.69             | 380                    | 190                       | 190     |
| 0.70-0.73             | 400                    | 200                       | 200     |
| 0.74-0.76             | 420                    | 210                       | 210     |
| 0.77-0.80             | 440                    | 220                       | 220     |
| 0.81-0.83             | 460                    | 230                       | 230     |
| 0.84-0.87             | 480                    | 240                       | 240     |
| 0.88-0.91             | 500                    | 250                       | 250     |
| 0.92-0.94             | 520                    | 260                       | 260     |
| 0.95-0.98             | 540                    | 270                       | 270     |
| 0.99-1.03             | 560                    | 280                       | 280     |
| 1.04-1.09             | 600                    | 300                       | 300     |
| 1.10-1.12             | 620                    | 310                       | 310     |
| 1.13-1.16             | 640                    | 320                       | 320     |
| 1.17-1.21             | 660                    | 330                       | 330     |
| 1.22-1.26             | 700                    | 350                       | 350     |
| 1.27-1.30             | 720                    | 360                       | 360     |
| 1.31-1.37             | 740                    | 370                       | 370     |
| 1.38-1.44             | 800                    | 400                       | 400     |
| 1.45-1.48             | 820                    | 410                       | 410     |
| 1.49-1.55             | 840                    | 420                       | 420     |
| 1.56-1.62             | 900                    | 450                       | 450     |
| 1.63-1.71             | 920                    | 460                       | 460     |
| 1.72-1.80             | 1000                   | 500                       | 500     |
| 1.81-1.89             | 1020                   | 510                       | 510     |
| ≥ 1.90                | 1100                   | 550                       | 550     |
